# Supplementary material for: Immunopeptidomics-based identification of naturally presented non-canonical circRNA-derived peptides
Source: PubMed Central journal article supplement (PMC10943130; doi:10.1038/s41467-024-46408-3), 2024-03-15
Supplement: 41467_2024_46408_MOESM1_ESM.pdf [file 41467_2024_46408_MOESM1_ESM.pdf]

**a**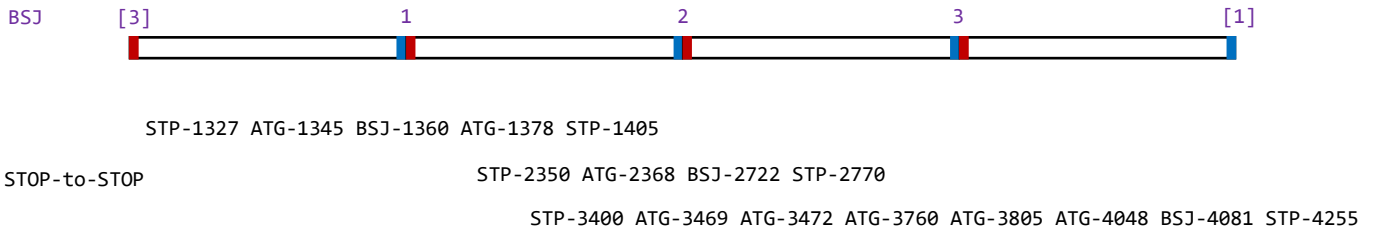**b**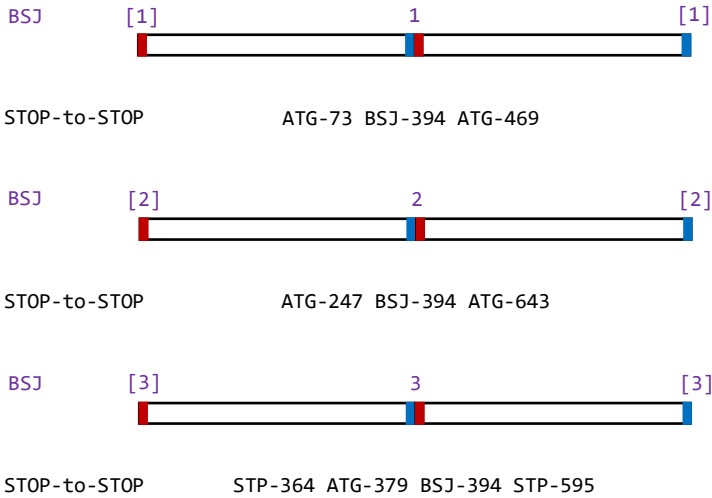

**Supplementary Figure 1. Method for the in silico generation and translation of BSJ-containing fragments in circRNAs.** (a) Four copies of a given circRNA sequence were concatenated into a single sequence (“4x circRNA”) and BSJs located within flanking STOP codons. In this example, three stop-to-stop fragments contain a single BSJ translated in one of the three reading frames. (b) If the circRNA sequence contains an integral number of codons, only two concatenated circRNA sequences are required since translation through the BSJ does not produce a translation frame change. Open boxes represent the circRNA sequence; blue and red boxes represent the 3'- and 5'-nucleotides contributing to the BSJ; numbers above the sequence boxes indicate sequential BSJs through the concatenated circRNA construct (partial BSJs are in square brackets).

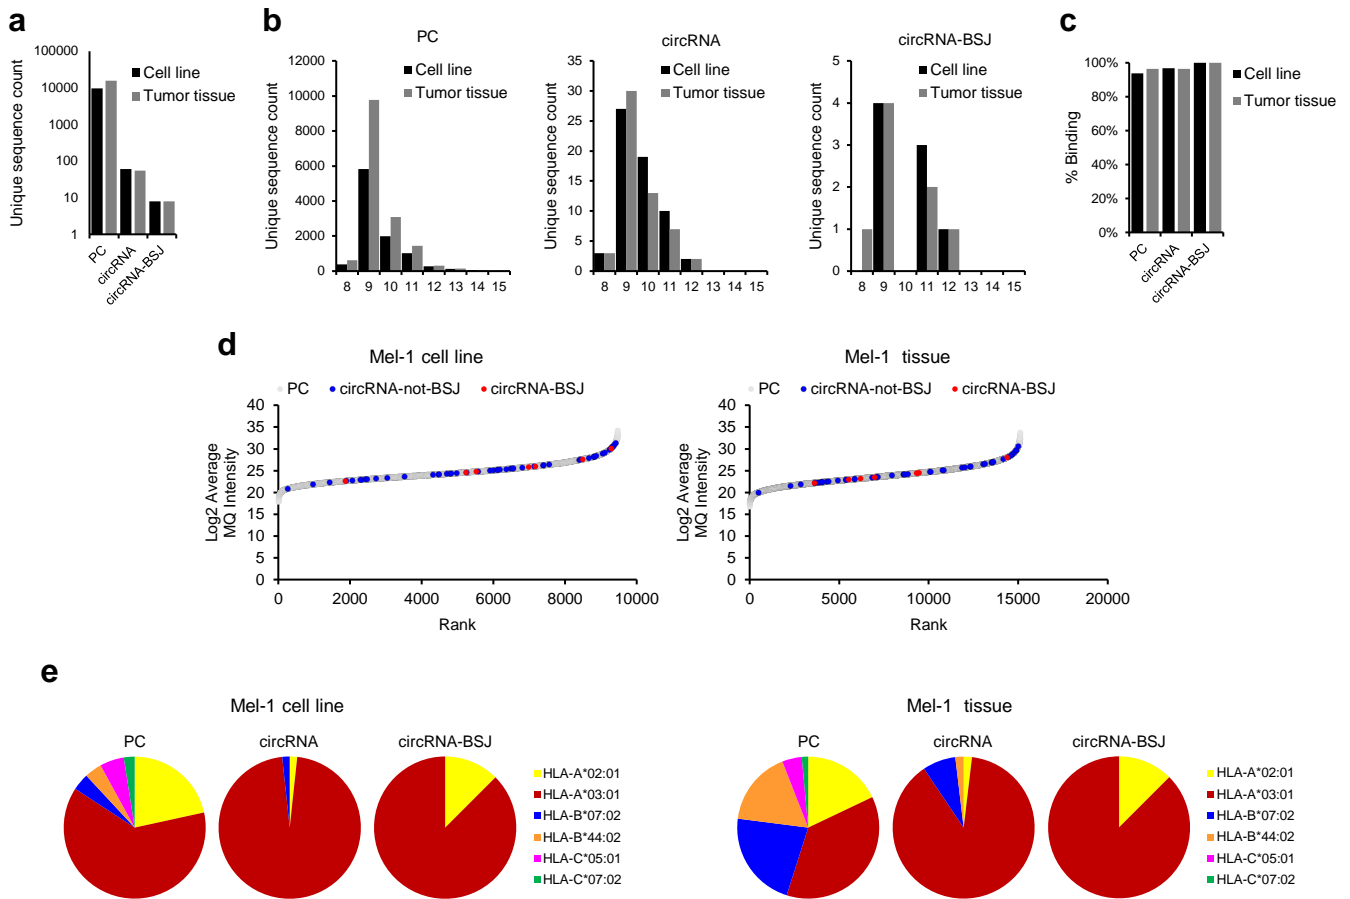

**Supplementary Figure 2. Overview of the immunopeptidomics analysis in Mel-1 patient.** (a) Total number of peptide sequences, (b) peptide length distribution and (c) percentage of peptides predicted as HLA binders (% rank < 2), in Mel-1 cell line and tumor tissues, in the PC, circRNA, and circRNA-BSJ groups. (d) Rank plots of PC, circRNA-not-BSJ and circRNA-BSJ derived peptide intensities in Mel-1 cell line and tumor tissues. (e) Predicted HLA restriction of PC, circRNA-not-BSJ and circRNA-BSJ derived peptides in cell line and tumor tissues from Mel-1 patient. Source data are provided as a Source Data file.

| Gene ID | circRNAs_frame     | Infinite translation candidate | Peptide Sequence | Length (AA) | NetMHCpan - 4.1 Binder/Best Allele | BSJ context (3'Exon -> Peptide [BSJ] <- 5'Exon)      | Patient ID | Detection |
|---------|--------------------|--------------------------------|------------------|-------------|------------------------------------|------------------------------------------------------|------------|-----------|
| ANXA6   | hsa_circ_0074614_0 | TRUE                           | VQDLIADLK        | 9           | no_binder                          | VVLQGTREEDDVSEDLVQQD->v[QD]LIADLK<-YELTKKFERLIVGLMRP | T1185B     | Cell line |

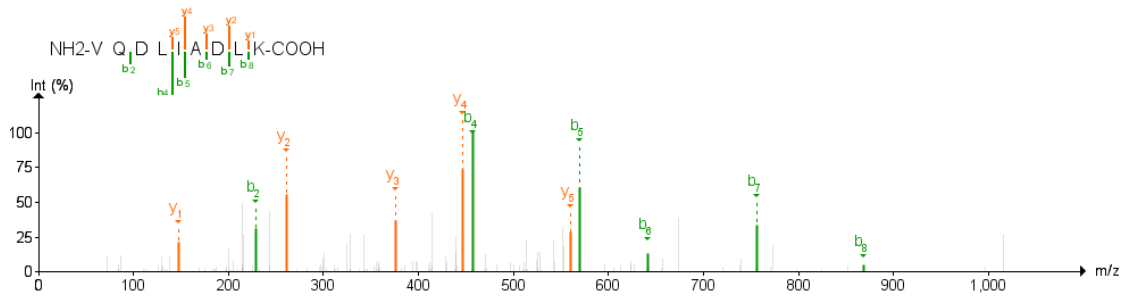

| Gene ID | circRNAs_frame     | Infinite translation candidate | Peptide Sequence | Length (AA) | NetMHCpan - 4.1 Binder/Best Allele | BSJ context (3'Exon -> Peptide [BSJ] <- 5'Exon) | Patient ID | Detection |
|---------|--------------------|--------------------------------|------------------|-------------|------------------------------------|-------------------------------------------------|------------|-----------|
| CBL1    | hsa_circ_0081903_0 | FALSE                          | DTFFGTFR         | 8           | HLA-A*68:01                        | GMTVKGVSCLQISEDFL->DTFFGTFR<-RI                 | T1185B     | Cell line |

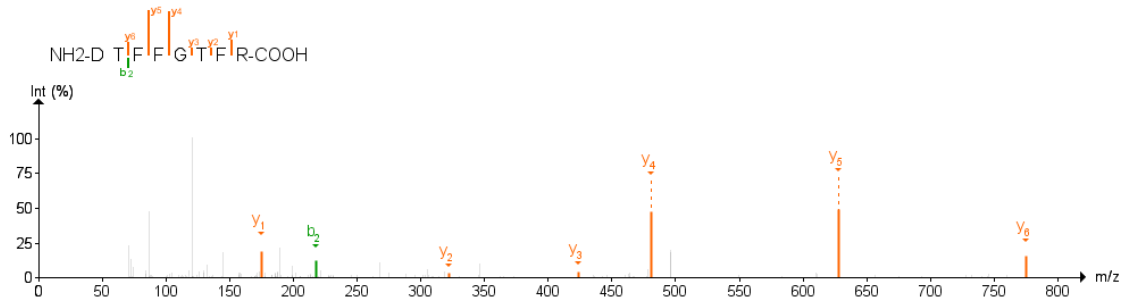

| Gene ID | circRNAs_frame     | Infinite translation candidate | Peptide Sequence | Length (AA) | NetMHCpan - 4.1 Binder/Best Allele | BSJ context (3'Exon -> Peptide [BSJ] <- 5'Exon)     | Patient ID | Detection |
|---------|--------------------|--------------------------------|------------------|-------------|------------------------------------|-----------------------------------------------------|------------|-----------|
| CDC73   | hsa_circ_0111569_0 | TRUE                           | TTENIPVRR        | 10          | HLA-A*68:01                        | KEETEGFKIDTMGTYHGMLKSV->[TT]ENIPVRR<-PDRKDLGLYNGEAS | T1185B     | Cell line |

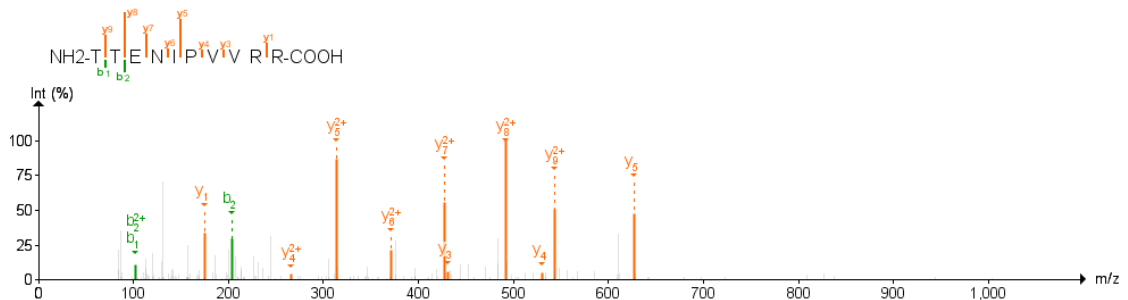

| Gene ID | circRNAs_frame     | Infinite translation candidate | Peptide Sequence | Length (AA) | NetMHCpan - 4.1 Binder/Best Allele | BSJ context (3'Exon -> Peptide [BSJ] <- 5'Exon) | Patient ID | Detection |
|---------|--------------------|--------------------------------|------------------|-------------|------------------------------------|-------------------------------------------------|------------|-----------|
| CLASP2  | hsa_circ_0123550_2 | FALSE                          | LETLGDKECI       | 10          | no_binder                          | SFSVWDEHFKTILLLL->LETLGDK[EC]I<-                | T1185B     | Cell line |

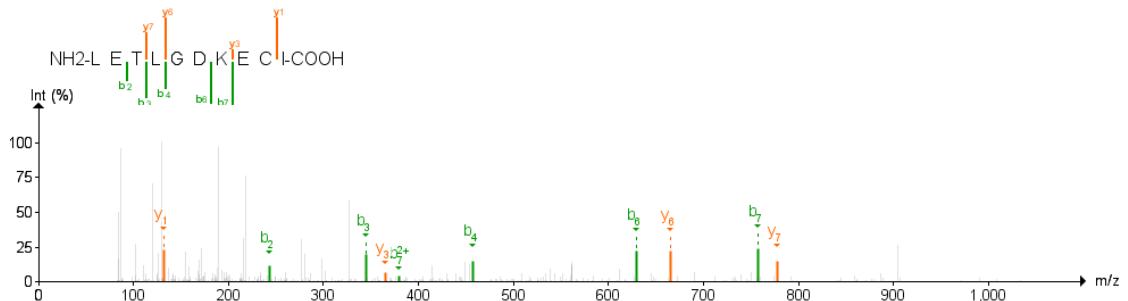

| Gene ID | circRNAs_frame     | Infinite translation candidate | Peptide Sequence | Length (AA) | NetMHCpan - 4.1 Binder/Best Allele | BSJ context (3'Exon -> Peptide [BSJ] <- 5'Exon)      | Patient ID | Detection |
|---------|--------------------|--------------------------------|------------------|-------------|------------------------------------|------------------------------------------------------|------------|-----------|
| CTNNB1  | hsa_circ_0003137_1 | FALSE                          | RVFEVYHTTVLK     | 12          | HLA-A*68:01                        | MATKKA->[R]VFEVYHTTVLK<-IQRGQWLLKLI                  | T1185B     | Cell line |
|         | hsa_circ_0004030_1 | FALSE                          |                  |             |                                    | SWMGCLOVTAISWPGLLTCKSSF->[R]VFEVYHTTVLK<-IQRGQWLLKLI |            |           |

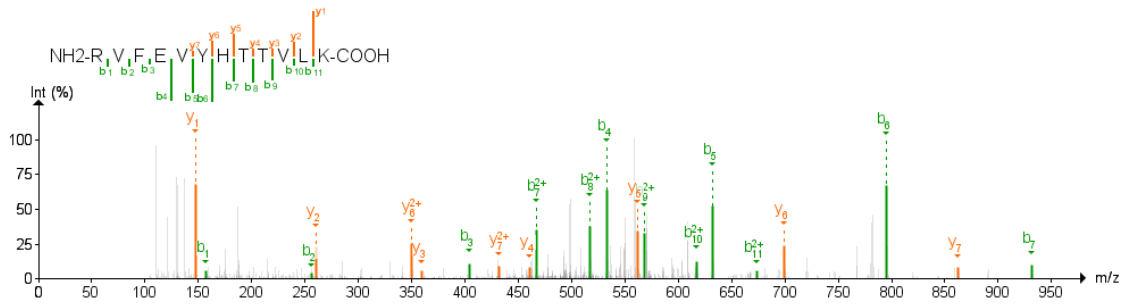

| Gene ID | circRNAs_frame     | Infinite translation candidate | Peptide Sequence | Length (AA) | NetMHCpan - 4.1 Binder/Best Allele | BSJ context (3'Exon -> Peptide [BSJ] <- 5'Exon) | Patient ID | Detection |
|---------|--------------------|--------------------------------|------------------|-------------|------------------------------------|-------------------------------------------------|------------|-----------|
| CTSB    | hsa_circ_0083357_1 | FALSE                          | STMSTNGIPRGR     | 9           | HLA-A*68:01                        | GAGPLSIPCRMSW->STMSTNGIPRGR<-GRGREGT            | T1185B     | Cell line |
|         |                    |                                | STNGIPRGR        |             |                                    | GAGPLSIPCRMSWSTM->STNGIPRGR<-GRGREGT            |            |           |

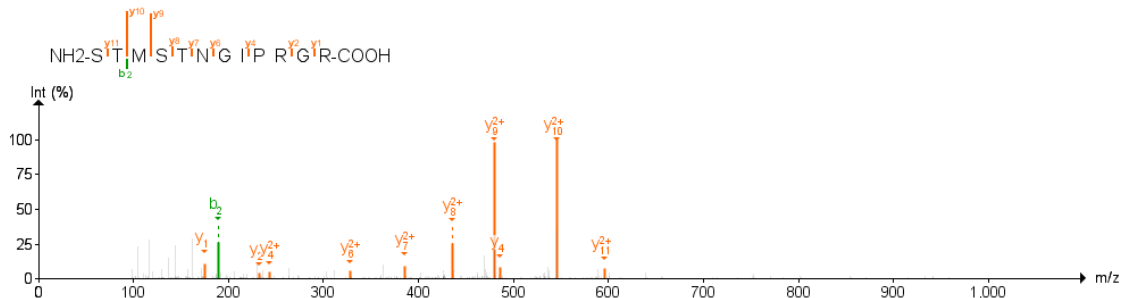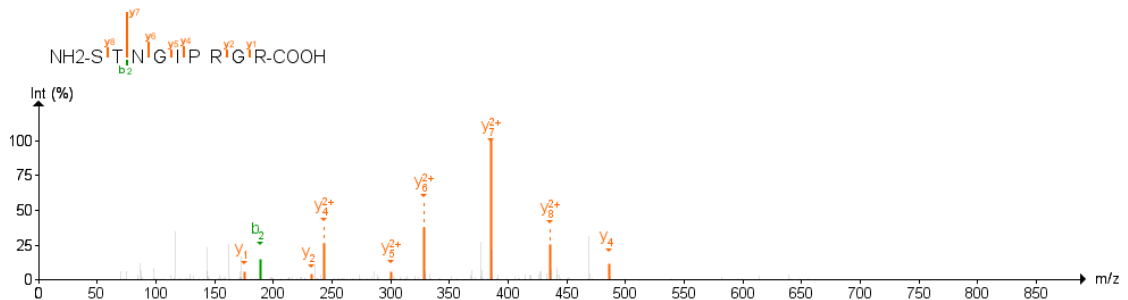

| Gene ID | circRNAs_frame     | Infinite translation candidate | Peptide Sequence | Length (AA) | NetMHCpan - 4.1 Binder/Best Allele | BSJ context (3'Exon -> Peptide [BSJ] <- 5'Exon)          | Patient ID | Detection |
|---------|--------------------|--------------------------------|------------------|-------------|------------------------------------|----------------------------------------------------------|------------|-----------|
| GAS7    | hsa_circ_0042080_0 | FALSE                          | EAWNGPPSAGR      | 11          | HLA-A*68:01                        | WERPSSSPGIPASPGSHRSSLPPT->[E]AWNGPPSAGR<-RKPDPGHPSTWLAEL | T1185B     | Cell line |

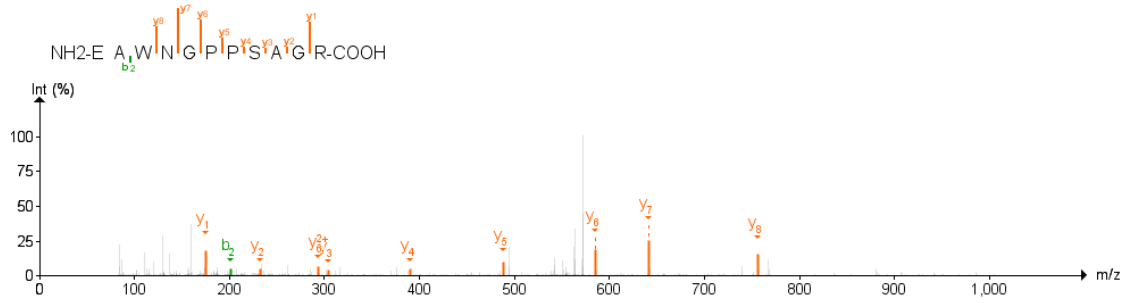

| Gene ID  | circRNAs_frame     | Infinite translation candidate | Peptide Sequence | Length (AA) | NetMHCpan - 4.1 Binder/Best Allele | BSJ context (3'Exon -> Peptide [BSJ] <- 5'Exon)      | Patient ID | Detection |
|----------|--------------------|--------------------------------|------------------|-------------|------------------------------------|------------------------------------------------------|------------|-----------|
| KIAA0226 | hsa_circ_0068719_1 | FALSE                          | SSITGLSVTR       | 10          | HLA-A*68:01                        | MVAWSGFAGTCRA->SSITGLSVT[R]<-REHWQLLGNLKTVEGLVSTNSPN | T1185B     | Cell line |

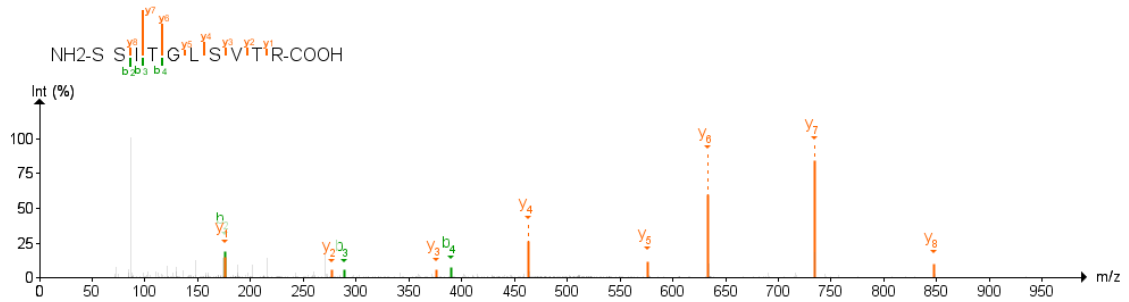

| Gene ID | circRNAs_frame     | Infinite translation candidate | Peptide Sequence | Length (AA) | NetMHCpan - 4.1 Binder/Best Allele | BSJ context (3'Exon -> Peptide [BSJ] <- 5'Exon) | Patient ID | Detection |
|---------|--------------------|--------------------------------|------------------|-------------|------------------------------------|-------------------------------------------------|------------|-----------|
| LIN9    | hsa_circ_0016709_0 | FALSE                          | EIYSNNVNTR       | 10          | HLA-A*68:01                        | ADV SQFKDLPDEIPLVLVIGTKVT->[E]IYSNNVNTR<-       | T1185B     | Cell line |

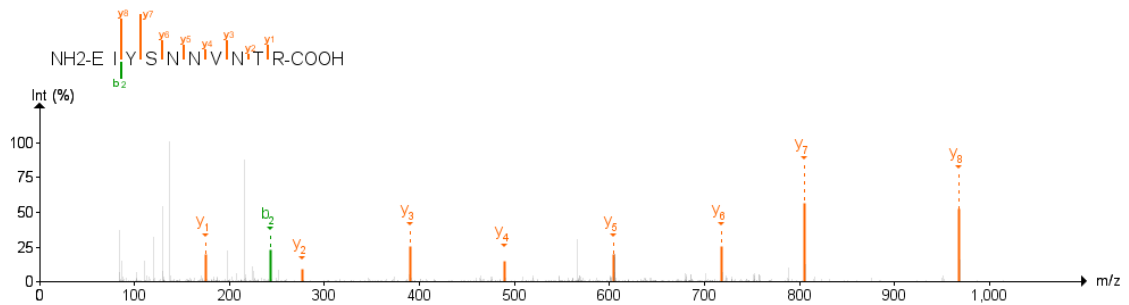

| Gene ID   | circRNAs_frame     | Infinite translation candidate | Peptide Sequence | Length (AA) | NetMHCpan - 4.1 Binder/Best Allele | BSJ context (3'Exon -> Peptide [BSJ] <- 5'Exon) | Patient ID | Detection |
|-----------|--------------------|--------------------------------|------------------|-------------|------------------------------------|-------------------------------------------------|------------|-----------|
| LINC00221 | hsa_circ_0101415_1 | FALSE                          | AAAAFRFP         | 9           | HLA-A*68:01                        | MPARSWLGE->AAAAFRFP[R]<-DFCVCAHIDVPTLCPSQ       | T1185B     | Cell line |
|           |                    |                                | EAAAAFRFP        | 10          | HLA-A*68:01                        | MPARSWLG->EAAAAFRFP[R]<-DFCVCAHIDVPTLCPSQ       |            |           |
|           | hsa_circ_0101416_0 | FALSE                          | AAAAFRFP         | 9           | HLA-A*68:01                        | MPARSWLGE->AAAAFRFP[R]<-M                       |            |           |
|           |                    |                                | EAAAAFRFP        | 10          | HLA-A*68:01                        | MPARSWLG->EAAAAFRFP[R]<-M                       |            |           |

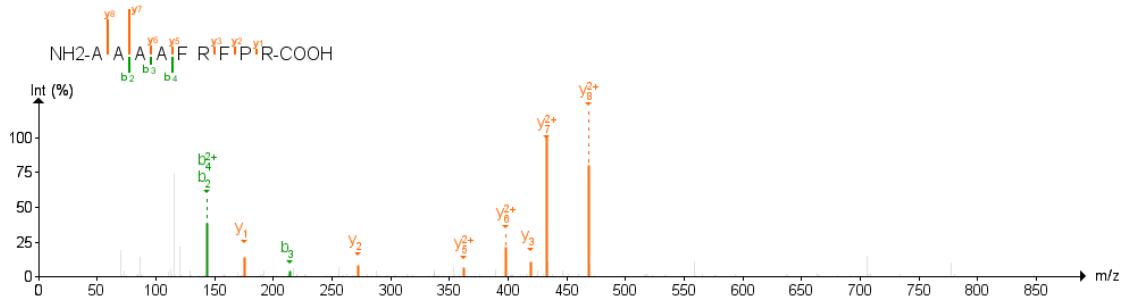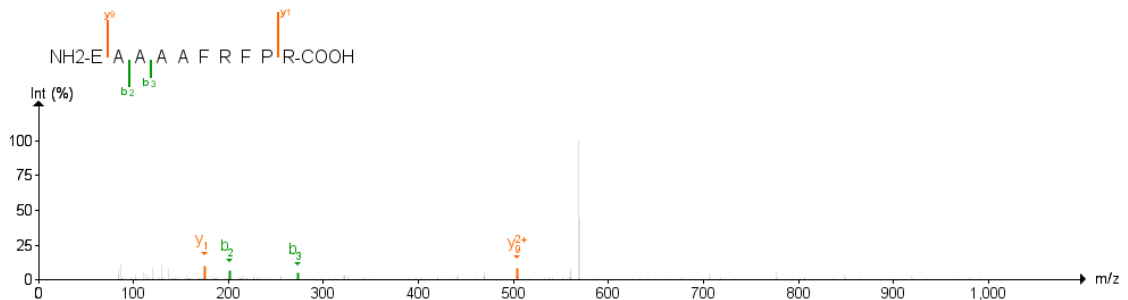

| Gene ID | circRNAs_frame     | Infinite translation candidate | Peptide Sequence | Length (AA) | NetMHCpan - 4.1 Binder/Best Allele | BSJ context (3'Exon -> Peptide [BSJ] <- 5'Exon) | Patient ID | Detection |
|---------|--------------------|--------------------------------|------------------|-------------|------------------------------------|-------------------------------------------------|------------|-----------|
| NOD1    | hsa_circ_0079703_1 | FALSE                          | VPAPPSLTR        | 9           | HLA-A*68:01                        | MTTSRPKMRRLC->VPAPPSLT[R]<-GCAE                 | T1185B     | Cell line |

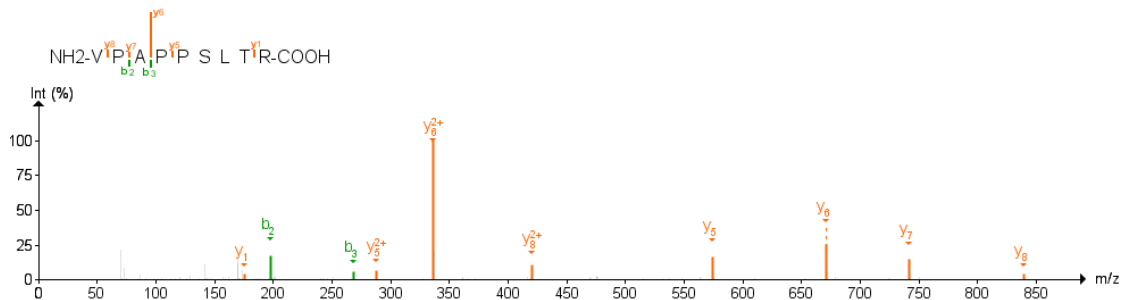

| Gene ID  | circRNAs_frame     | Infinite translation candidate | Peptide Sequence | Length (AA) | NetMHCpan - 4.1 Binder/Best Allele | BSJ context (3'Exon -> Peptide [BSJ] <- 5'Exon) | Patient ID | Detection |
|----------|--------------------|--------------------------------|------------------|-------------|------------------------------------|-------------------------------------------------|------------|-----------|
| PAFAH1B2 | hsa_circ_0095083_1 | FALSE                          | STTDLFWTVK       | 10          | HLA-A*68:01                        | MENWRILSL->[S]TTLDFWTVK<-TKSLMYCSWETPWCS        | T1185B     | Cell line |

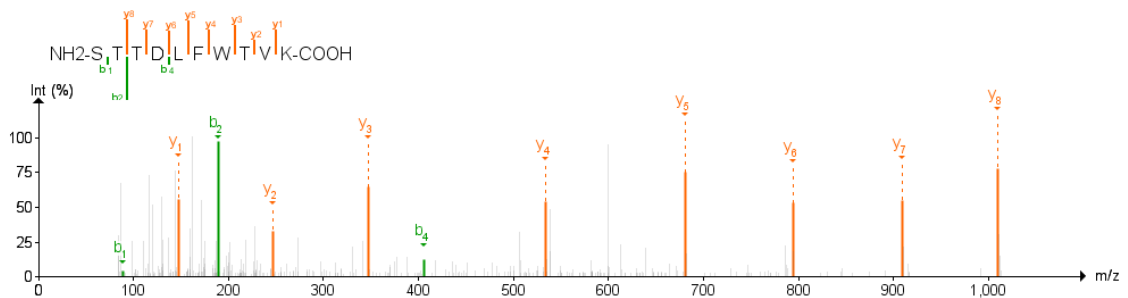

| Gene ID | circRNAs_frame     | Infinite translation candidate | Peptide Sequence | Length (AA) | NetMHCpan - 4.1 Binder/Best Allele | BSJ context (3'Exon -> Peptide [BSJ] <- 5'Exon)                           | Patient ID | Detection |
|---------|--------------------|--------------------------------|------------------|-------------|------------------------------------|---------------------------------------------------------------------------|------------|-----------|
| PKNOX1  | hsa_circ_0061852_2 | FALSE                          | QTPFAFHPR        | 9           | HLA-A*68:01                        | VVT <b>PQ</b> QVVTQTLS <b>P</b> GTIRIQNS-> <b>[QT]</b> PF <b>A</b> FHPR<- | T1185B     | Cell line |
|         | hsa_circ_0116109_2 | FALSE                          |                  |             |                                    | KTKM <b>N</b> SETLLSGEPGSPYSPVQS-> <b>[QT]</b> PF <b>A</b> FHPR<-         |            |           |
|         | hsa_circ_0116112_2 | FALSE                          |                  |             |                                    | TPV <b>M</b> NVDSLQSLSSDGATLAVQ-> <b>[QT]</b> PF <b>A</b> FHPR<-          |            |           |

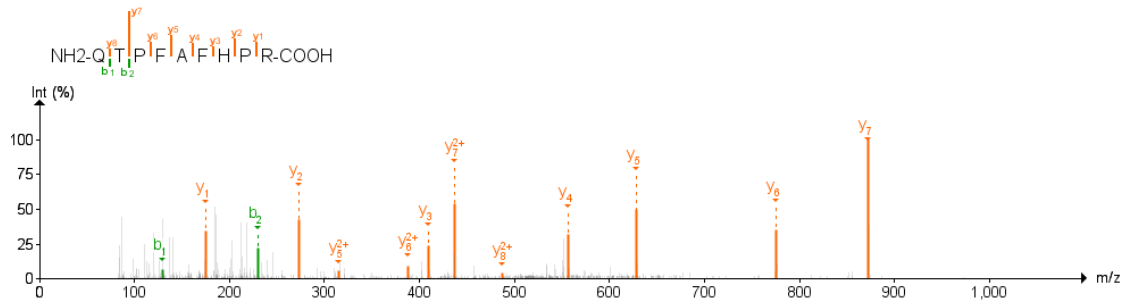

| Gene ID | circRNAs_frame     | Infinite translation candidate | Peptide Sequence | Length (AA) | NetMHCpan - 4.1 Binder/Best Allele | BSJ context (3'Exon -> Peptide [BSJ] <- 5'Exon)                                    | Patient ID | Detection |
|---------|--------------------|--------------------------------|------------------|-------------|------------------------------------|------------------------------------------------------------------------------------|------------|-----------|
| PTPRG   | hsa_circ_0066402_0 | FALSE                          | NTASMAGGFLR      | 12          | HLA-A*68:01                        | MAQRAL->NTASMAGGFL <b>[R]</b> <-HVTSC <b>M</b> EAWPVSSPALFVPSQ <b>P</b> A <b>P</b> | T1185B     | Cell line |
|         | hsa_circ_0066406_0 | FALSE                          |                  |             |                                    | MAQRAL->NTASMAGGFL <b>[R]</b> <-CL <b>W</b> S                                      |            |           |
|         | hsa_circ_0124401_0 | FALSE                          |                  |             |                                    | MAQRAL->NTASMAGGFL <b>[R]</b> <-Y <b>R</b> TCSD                                    |            |           |

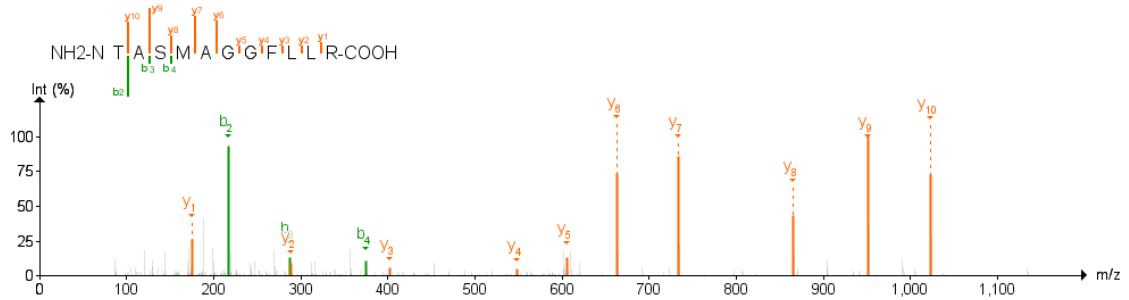

| Gene ID        | circRNAs_frame     | Infinite translation candidate | Peptide Sequence | Length (AA) | NetMHCpan - 4.1 Binder/Best Allele | BSJ context (3'Exon -> Peptide [BSJ] <- 5'Exon)                                                     | Patient ID | Detection |
|----------------|--------------------|--------------------------------|------------------|-------------|------------------------------------|-----------------------------------------------------------------------------------------------------|------------|-----------|
| RFWD2/<br>COP1 | hsa_circ_0015364_0 | FALSE                          | DLYNGSSIVSR      | 11          | HLA-A*68:01                        | YNSVRPLATLSYAS->DLYNGSSIV <b>[R]</b> <-QR <b>N</b> SLGI <b>A</b> R                                  | T1185B     | Cell line |
|                | hsa_circ_0015366_0 | FALSE                          |                  |             |                                    | YNSVRPLATLSYAS->DLYNGSSIV <b>[R]</b> <-NH <b>M</b> QPNYRFLWNSSRLQ <b>E</b> IRE <b>S</b> N           |            |           |
|                | hsa_circ_0111261_0 | FALSE                          |                  |             |                                    | YNSVRPLATLSYAS->DLYNGSSIV <b>[R]</b> <-K                                                            |            |           |
|                | hsa_circ_0111262_1 | FALSE                          |                  |             |                                    | YNSVRPLATLSYAS->DLYNGSSIV <b>[R]</b> <-T <b>S</b> G <b>T</b> MMN <b>R</b> SGD <b>S</b> G <b>A</b> S |            |           |

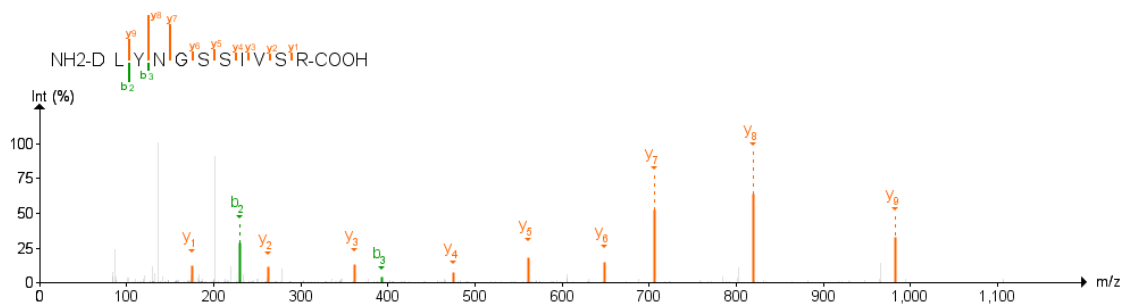

| Gene ID | circRNAs_frame     | Infinite translation candidate | Peptide Sequence    | Length (AA) | NetMHCpan - 4.1 Binder/Best Allele | BSJ context (3'Exon -> Peptide [BSJ] <- 5'Exon)                                                                                                                       | Patient ID | Detection |
|---------|--------------------|--------------------------------|---------------------|-------------|------------------------------------|-----------------------------------------------------------------------------------------------------------------------------------------------------------------------|------------|-----------|
| STAT3   | hsa_circ_0043818_1 | TRUE                           | TIYE <b>S</b> SSFFR | 11          | HLA-A*68:01                        | SIA <b>A</b> CKSR <b>M</b> FSIS->TIYE <b>S</b> SSFF <b>[R]</b> <-V <b>S</b> G <b>A</b> AA <b>A</b> QTGRG <b>S</b> R <b>G</b> FR <b>R</b> RS <b>R</b> G <b>N</b> K     | T1185B     | Cell line |
|         | hsa_circ_0106859_1 | FALSE                          |                     |             |                                    | SIA <b>A</b> CKSR <b>M</b> FSIS->TIYE <b>S</b> SSFF <b>[R]</b> <-M <b>A</b> Q <b>W</b> N <b>L</b> Q <b>L</b> D <b>R</b> Y <b>L</b> E <b>Q</b> L <b>H</b> Y <b>S</b> D |            |           |

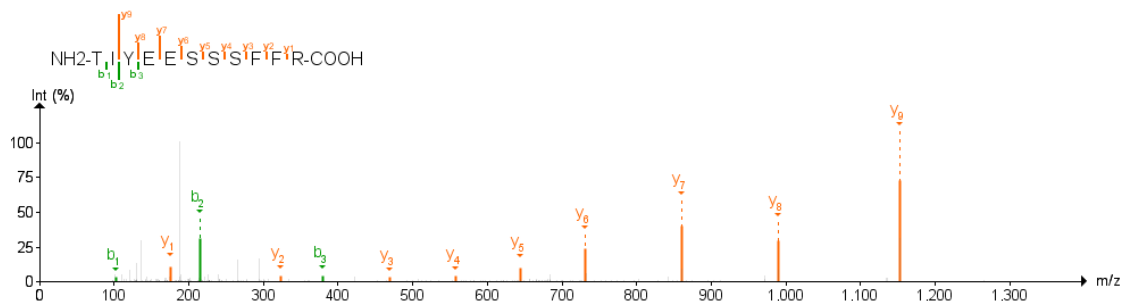

| Gene ID | circRNAs_frame     | Infinite translation candidate | Peptide Sequence | Length (AA) | NetMHCpan - 4.1 Binder/Best Allele | BSJ context (3'Exon -> Peptide [BSJ] <- 5'Exon) | Patient ID | Detection |
|---------|--------------------|--------------------------------|------------------|-------------|------------------------------------|-------------------------------------------------|------------|-----------|
| ABCA2   | hsa_circ_0089621_2 | FALSE                          | RLKEPSTQR        | 9           | HLA-A*03:01                        | ISWYVYVAMTIQHIVAKEKH->RLK[EP]STQR<-RP           | Mel-1      | Tumor     |

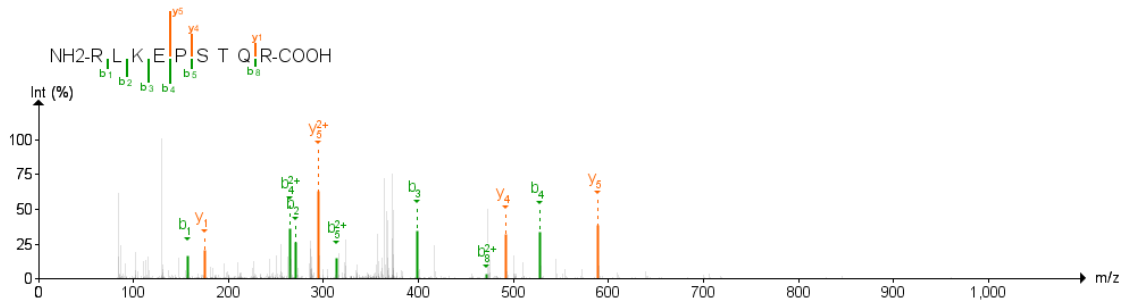

| Gene ID | circRNAs_frame     | Infinite translation candidate | Peptide Sequence | Length (AA) | NetMHCpan - 4.1 Binder/Best Allele | BSJ context (3'Exon -> Peptide [BSJ] <- 5'Exon) | Patient ID | Detection |
|---------|--------------------|--------------------------------|------------------|-------------|------------------------------------|-------------------------------------------------|------------|-----------|
| CCAR1   | hsa_circ_0018553_1 | FALSE                          | VLSKGGPKK        | 9           | HLA-A*03:01                        | ISAASITPLLOTQPGPLLQQPQK->[V]LSKGGPKK<-          | Mel-1      | Cell line |

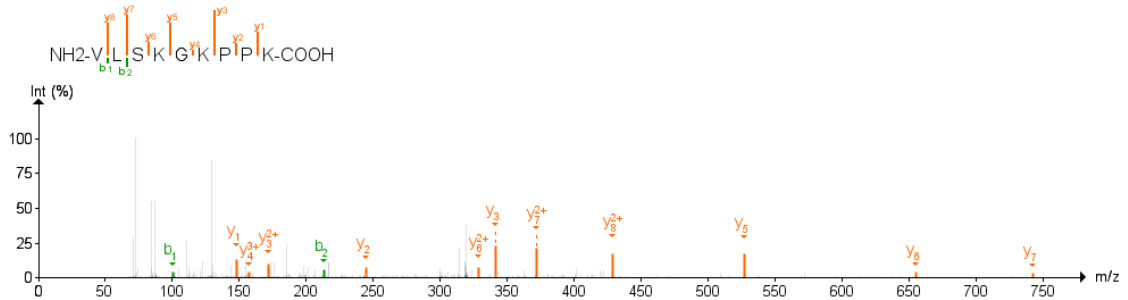

| Gene ID | circRNAs_frame     | Infinite translation candidate | Peptide Sequence | Length (AA) | NetMHCpan - 4.1 Binder/Best Allele | BSJ context (3'Exon -> Peptide [BSJ] <- 5'Exon) | Patient ID | Detection |
|---------|--------------------|--------------------------------|------------------|-------------|------------------------------------|-------------------------------------------------|------------|-----------|
| CEP57L1 | hsa_circ_0130265_1 | FALSE                          | KLRDPTDSTLR      | 11          | HLA-A*03:01                        | MGLSSCKN->KLRDPTDSTL[R]<-AWYLVQV                | Mel-1      | Cell line |

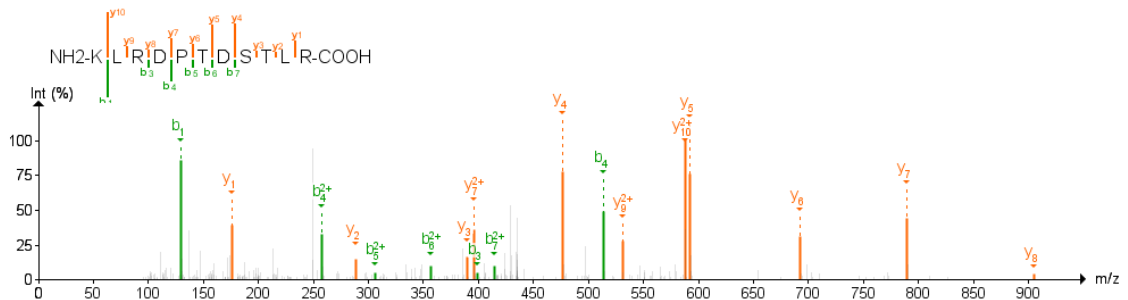

| Gene ID | circRNAs_frame     | Infinite translation candidate | Peptide Sequence | Length (AA) | NetMHCpan - 4.1 Binder/Best Allele | BSJ context (3'Exon -> Peptide [BSJ] <- 5'Exon)    | Patient ID | Detection         |
|---------|--------------------|--------------------------------|------------------|-------------|------------------------------------|----------------------------------------------------|------------|-------------------|
| CTNNB1  | hsa_circ_0003137_1 | FALSE                          | RVFEVYHTTVLK     | 12          | HLA-A*03:01                        | MATKKA->[R]VFEVYHTTVLK<-IQRGWLLKLI                 | Mel-1      | Cell line + Tumor |
|         | hsa_circ_0004030_1 | FALSE                          |                  |             |                                    | SWMGCLOVTAISWPGILTKSSF->[R]VFEVYHTTVLK<-IQRGWLLKLI |            |                   |

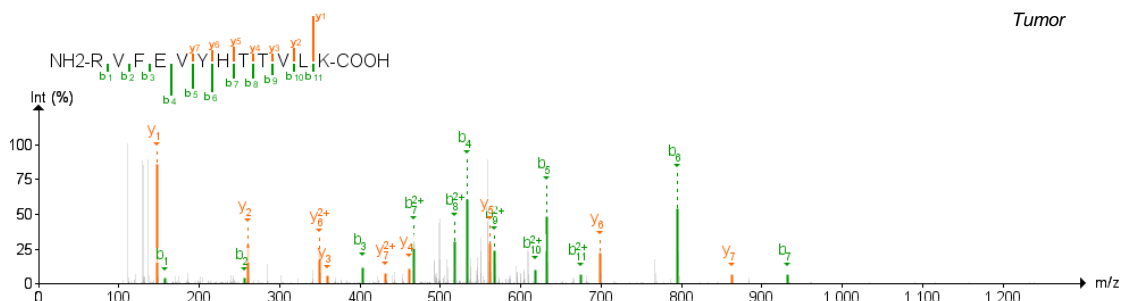

Tumor



| Gene ID | circRNAs_frame     | Infinite translation candidate | Peptide Sequence | Length (AA) | NetMHCpan - 4.1 Binder/Best Allele | BSJ context (3'Exon -> Peptide [BSJ] <- 5'Exon) | Patient ID | Detection         |
|---------|--------------------|--------------------------------|------------------|-------------|------------------------------------|-------------------------------------------------|------------|-------------------|
| MALAT1  | hsa_circ_0096124_2 | FALSE                          | KLLHGKKNVFK      | 11          | HLA-A*03:01                        | M->IKLJLHGKKNVFK<-RKLRERTTEPRINT                | Mel-1      | Cell line + Tumor |

Cell line

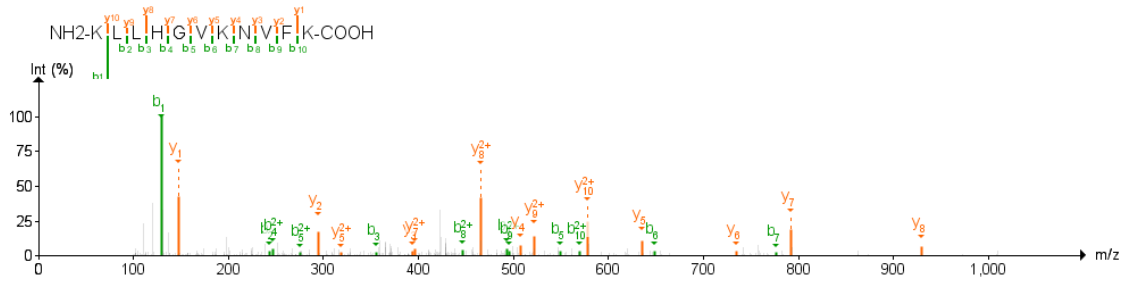

| Gene ID | circRNAs_frame     | Infinite translation candidate | Peptide Sequence | Length (AA) | NetMHCpan - 4.1 Binder/Best Allele | BSJ context (3'Exon -> Peptide [BSJ] <- 5'Exon)      | Patient ID | Detection |
|---------|--------------------|--------------------------------|------------------|-------------|------------------------------------|------------------------------------------------------|------------|-----------|
| PDIA3   | hsa_circ_0035034_2 | FALSE                          | RVSSYFVLH        | 9           | HLA-A*03:01                        | LLERLLLLSELLKERSLSCRSS->[RVSSYFVLH<-]SLTSLRTRLWHIQSK | Mel-1      | Cell line |

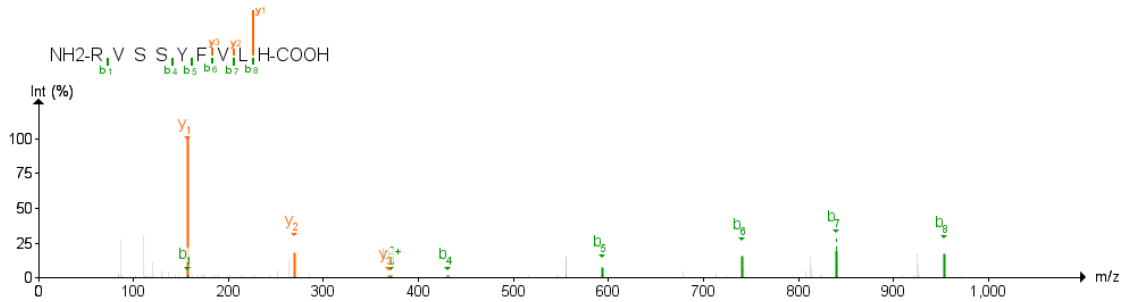

| Gene ID | circRNAs_frame     | Infinite translation candidate | Peptide Sequence | Length (AA) | NetMHCpan - 4.1 Binder/Best Allele | BSJ context (3'Exon -> Peptide [BSJ] <- 5'Exon)  | Patient ID | Detection         |
|---------|--------------------|--------------------------------|------------------|-------------|------------------------------------|--------------------------------------------------|------------|-------------------|
| SAE1    | hsa_circ_0051662_2 | FALSE                          | ILAQEIVKV        | 9           | HLA-A*02:01                        | MAPVCAVVG->ILAQEIV[KVI<-]LLLRDGPVSCGGWRDFGTGNCEG | Mel-1      | Cell line + Tumor |

Cell line

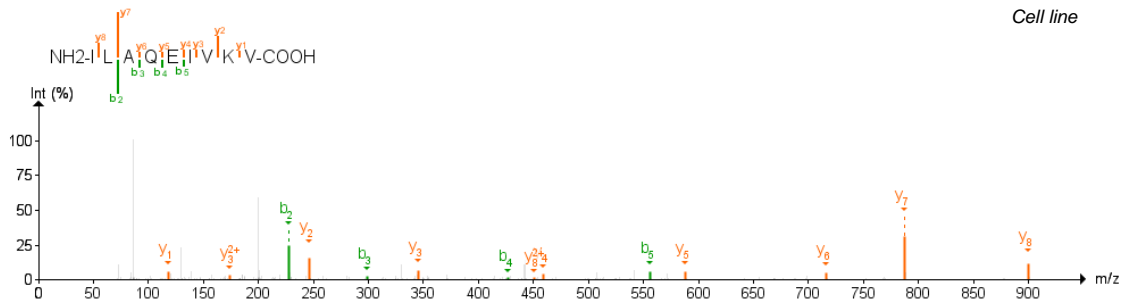

| Gene ID | circRNAs_frame     | Infinite translation candidate | Peptide Sequence | Length (AA) | NetMHCpan - 4.1 Binder/Best Allele | BSJ context (3'Exon -> Peptide [BSJ] <- 5'Exon) | Patient ID | Detection         |
|---------|--------------------|--------------------------------|------------------|-------------|------------------------------------|-------------------------------------------------|------------|-------------------|
| PPP2R3A | hsa_circ_0122039_2 | FALSE                          | KVLSFTEK         | 9           | HLA-A*03:01                        | SPVGDKAKDTTSAVLIQQTPEVI->[KV]LSFTEK<-           | Mel-1      | Cell line + Tumor |

Tumor

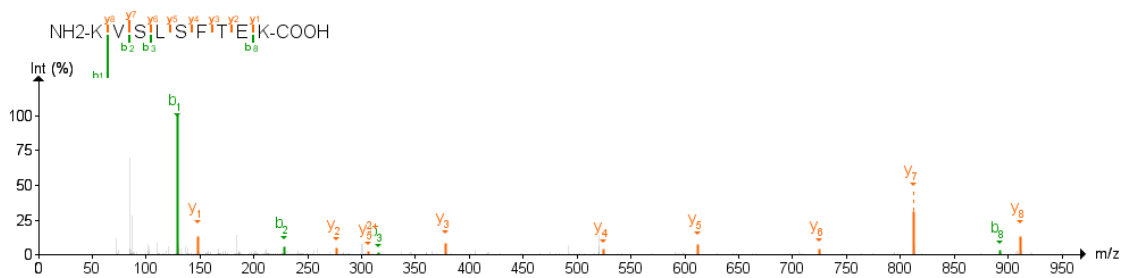

| Gene ID | circRNAs_frame     | Infinite translation candidate | Peptide Sequence | Length (AA) | NetMHCpan - 4.1 Binder/Best Allele | BSJ context (3'Exon -> Peptide [BSJ] <- 5'Exon) | Patient ID | Detection         |
|---------|--------------------|--------------------------------|------------------|-------------|------------------------------------|-------------------------------------------------|------------|-------------------|
| TOPBP1  | hsa_circ_0121989_1 | FALSE                          | KSLAAELLVK       | 11          | HLA-A*03:01                        | MYTPHCART->K[ <b>S</b> ]LAAELLVK<-              | Mel-1      | Cell line + Tumor |

Tumor

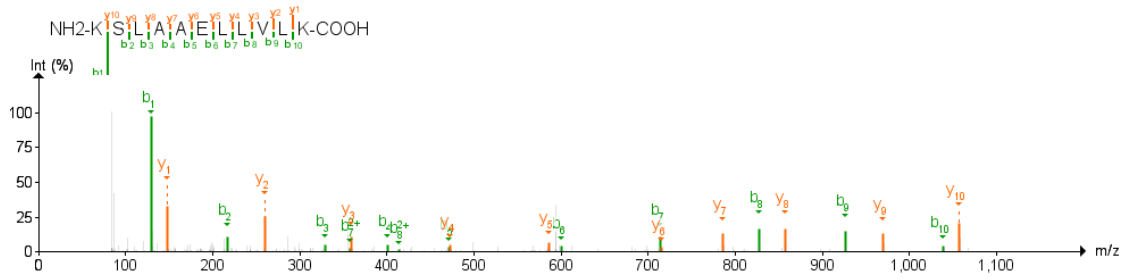

| Gene ID | circRNAs_frame     | Infinite translation candidate | Peptide Sequence | Length (AA) | NetMHCpan - 4.1 Binder/Best Allele | BSJ context (3'Exon -> Peptide [BSJ] <- 5'Exon)              | Patient ID | Detection |
|---------|--------------------|--------------------------------|------------------|-------------|------------------------------------|--------------------------------------------------------------|------------|-----------|
| WARS    | hsa_circ_0033185_2 | FALSE                          | VLTRLLNK         | 8           | HLA-A*03:01                        | MPRTSSPVALTSTRLSYSLTWTW->[ <b>V</b> ]LTRLLNK<-SSDLRPAVNVVPER | Mel-1      | Tumor     |
|         | hsa_circ_0033189_1 | FALSE                          |                  |             |                                    | SDGESAALESARPAPLLLLPVCM->[ <b>V</b> ]LTRLLNK<-SSDLRPAVNVVPER |            |           |

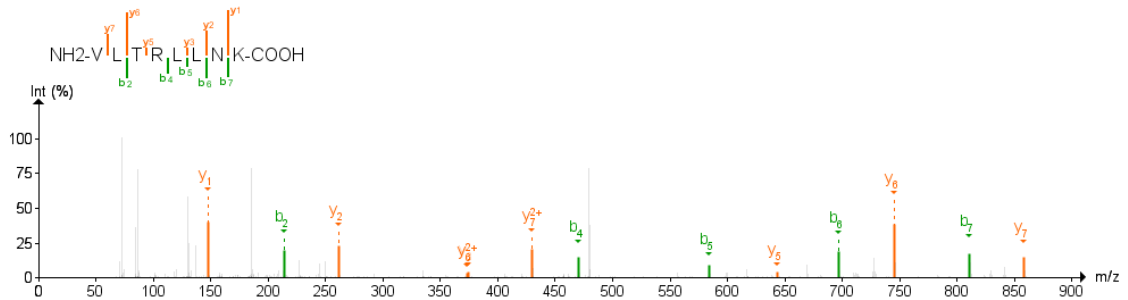

| Gene ID | circRNAs_frame     | Infinite translation candidate | Peptide Sequence | Length (AA) | NetMHCpan - 4.1 Binder/Best Allele | BSJ context (3'Exon -> Peptide [BSJ] <- 5'Exon)       | Patient ID | Detection |
|---------|--------------------|--------------------------------|------------------|-------------|------------------------------------|-------------------------------------------------------|------------|-----------|
| ZMYM4   | hsa_circ_0113154_2 | FALSE                          | RVVSWIQK         | 9           | HLA-A*03:01                        | DKAANQVEETLHTLHPQTPETNF->[ <b>R</b> ]V[V]VSWIQK<-CLKI | Mel-1      | Tumor     |

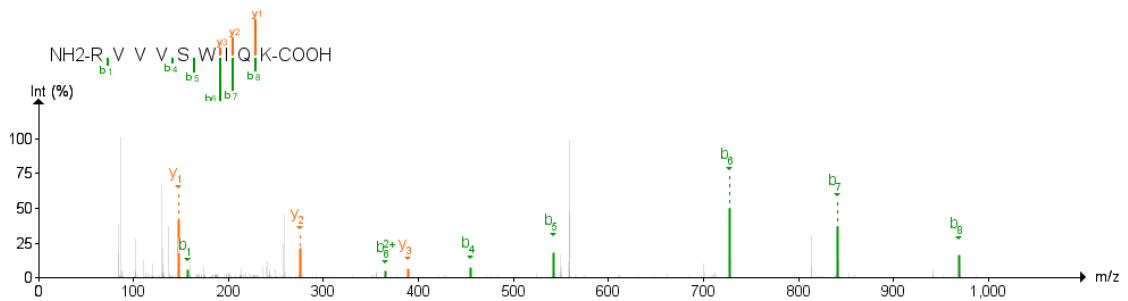

**Supplementary Figure 3. Spectrum visualization of the MS identified circRNA-BSJ derived peptides.** MS/MS spectra of peptides identified in T1185B and Mel-1, encoded in circRNAs from different host genes. Sample source is indicated for spectrums from peptides detected in both cell line and tissue from Mel-1 patient.

**a****COP1 (RFWD2)/T1185B****Peptide: DLYNGSSIVSR****Precursor charge: ++**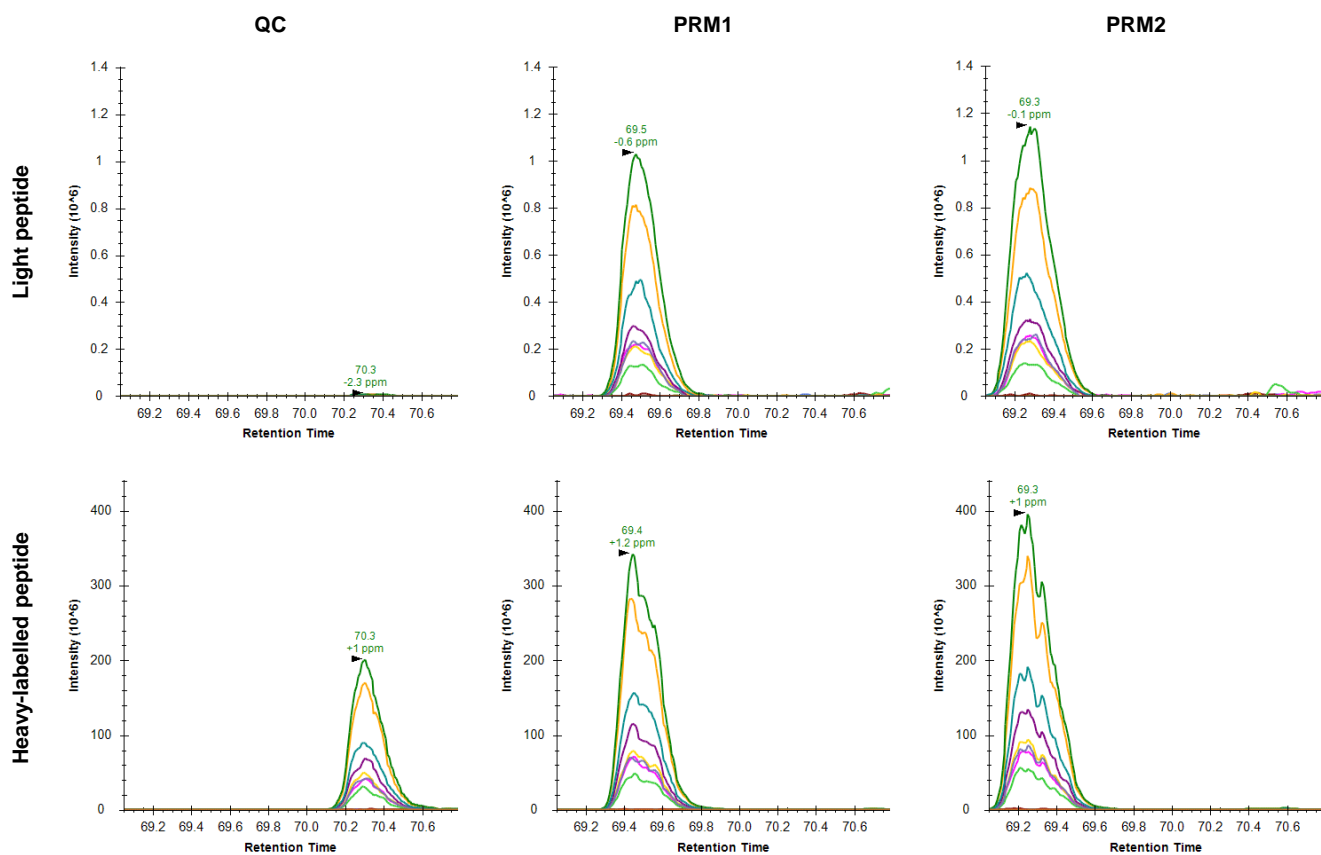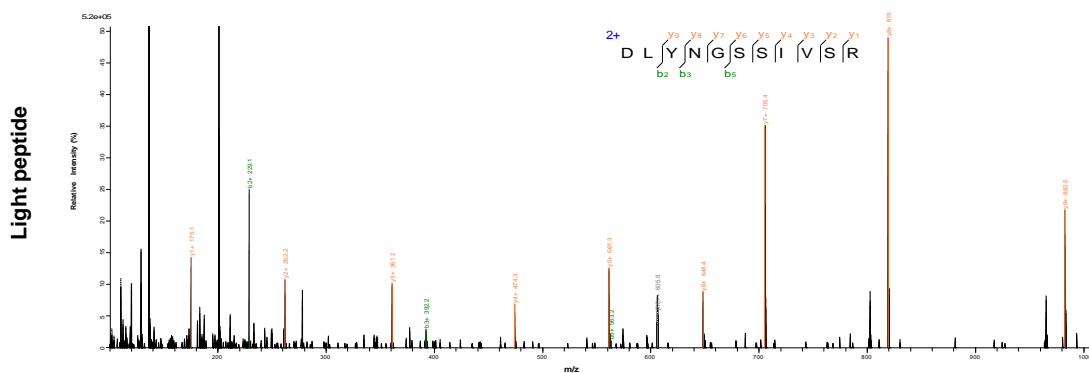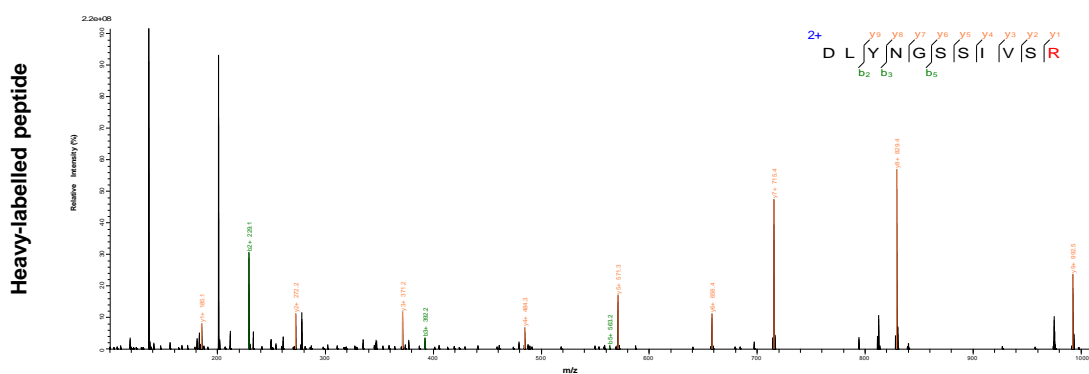

**b**

CDC73/T1185B

Peptide: TTENIPVRR

Precursor charge: ++

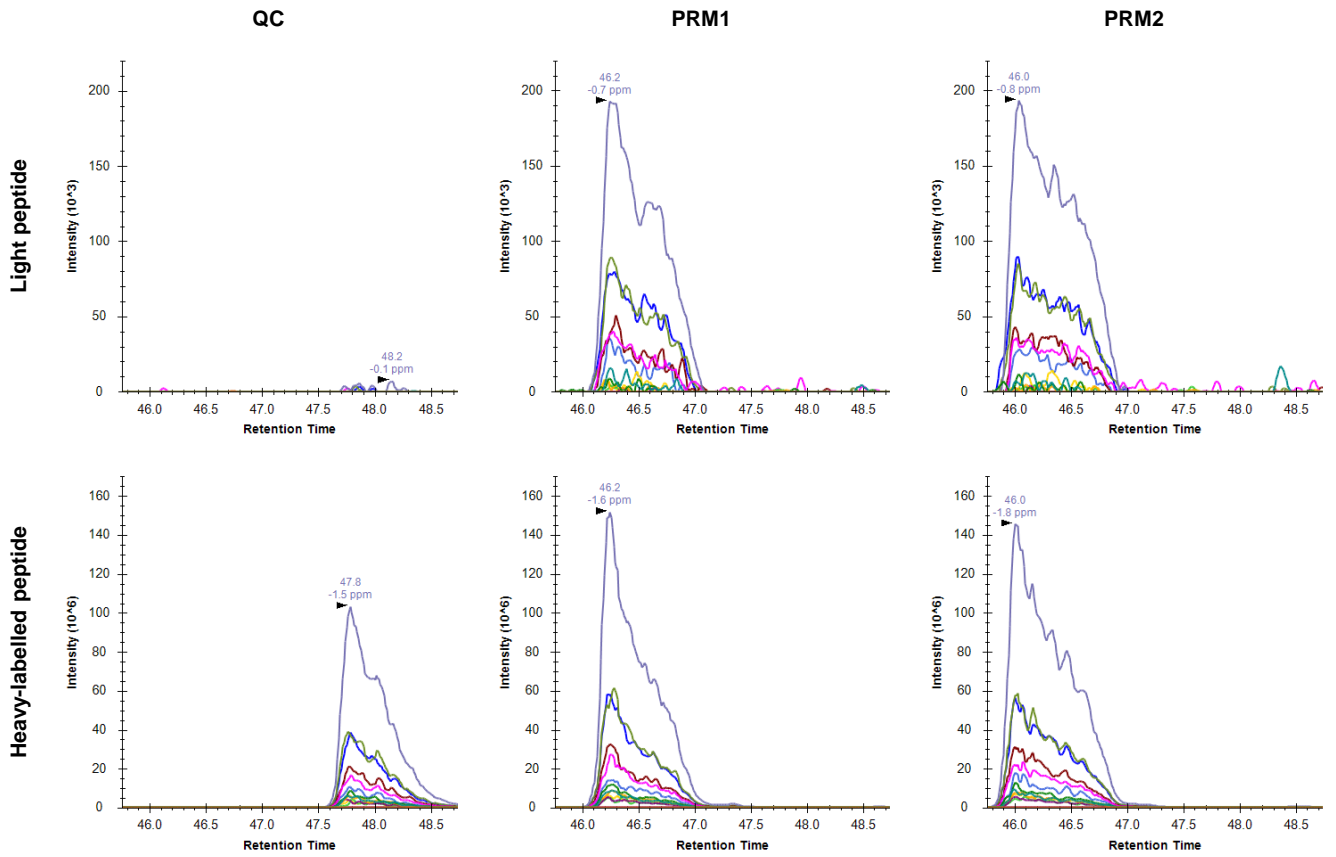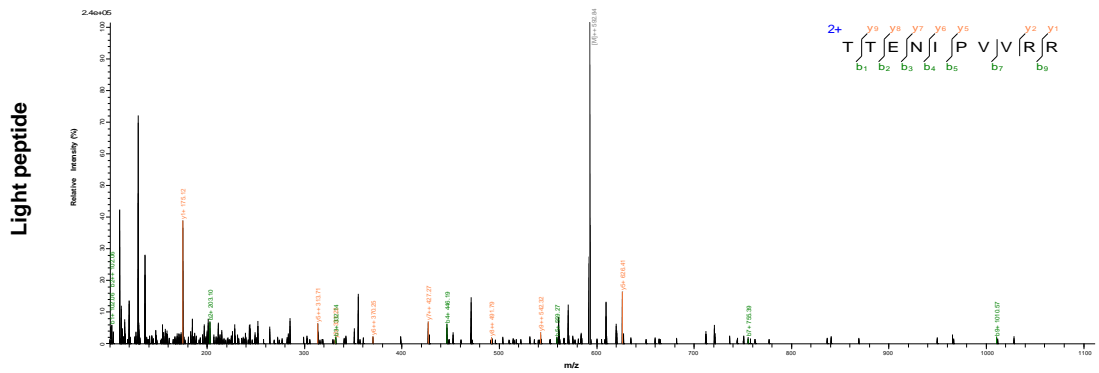

C

CTNNB1/T1185B

Peptide: RVFEVYHTTVLK

Precursor charge: +++

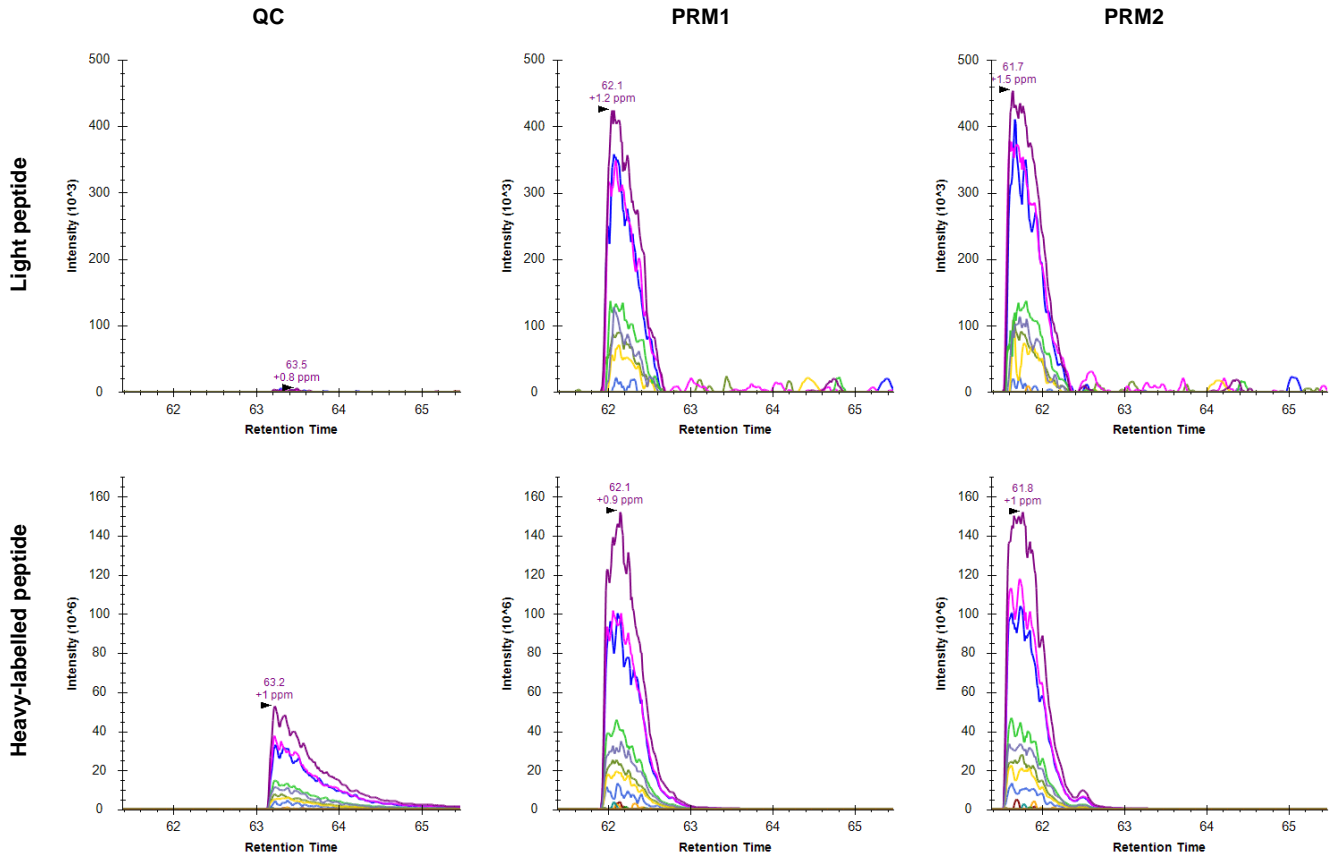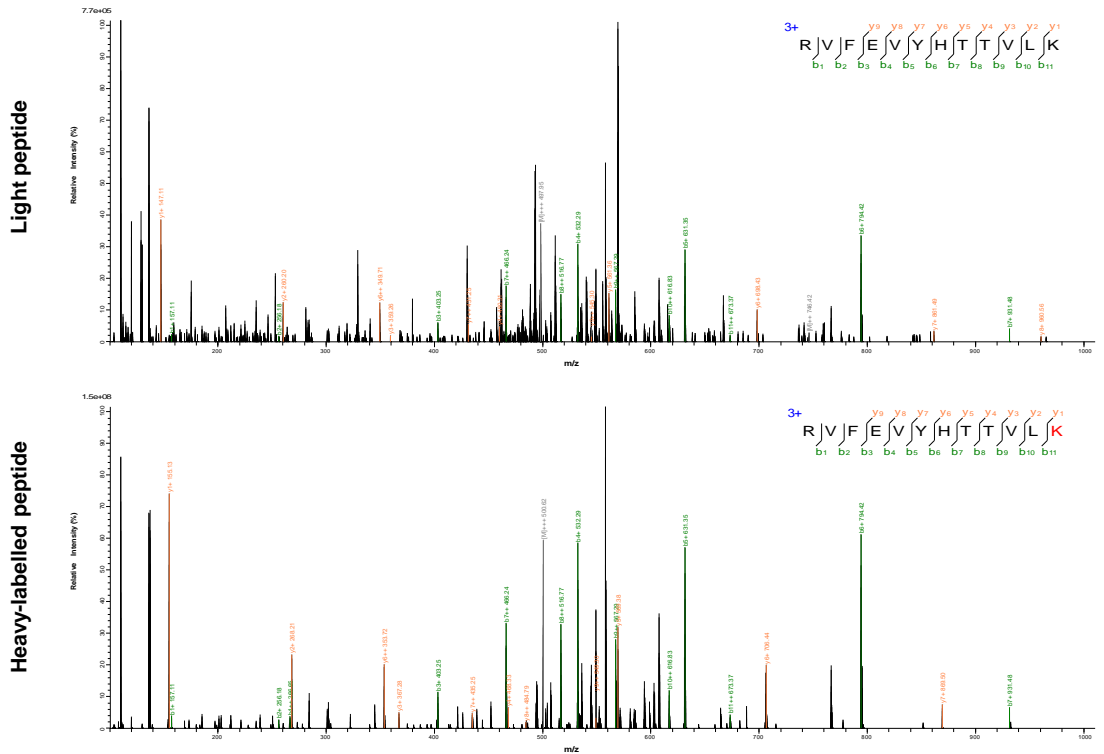

d

CTSB/T1185B

Peptide: STNGIPRGR

Precursor charge: ++

Light peptide

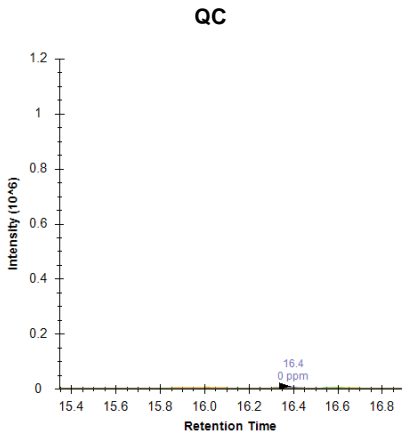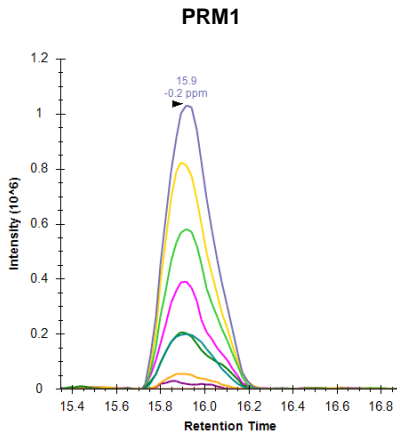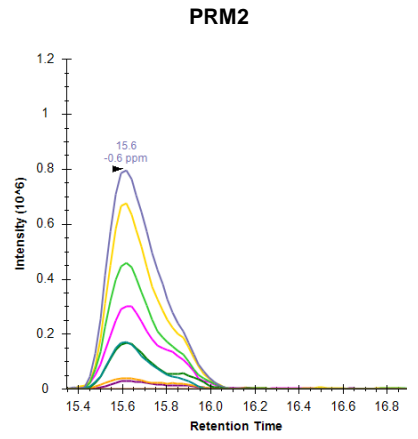

Heavy-labelled peptide

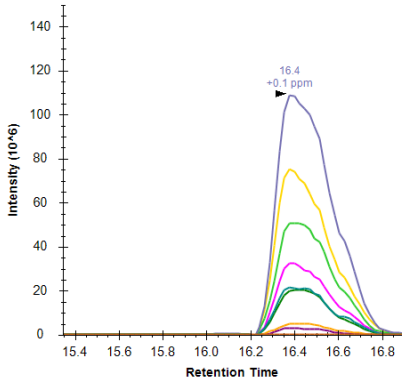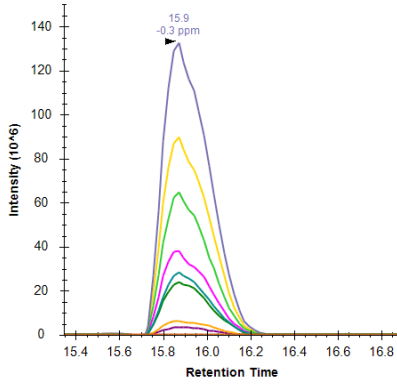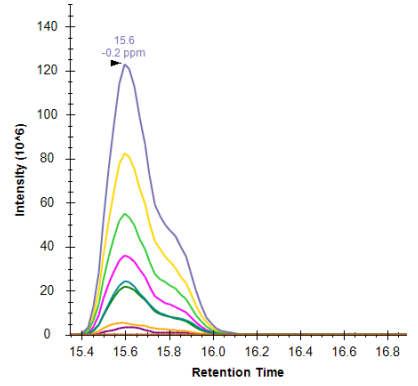

Light peptide

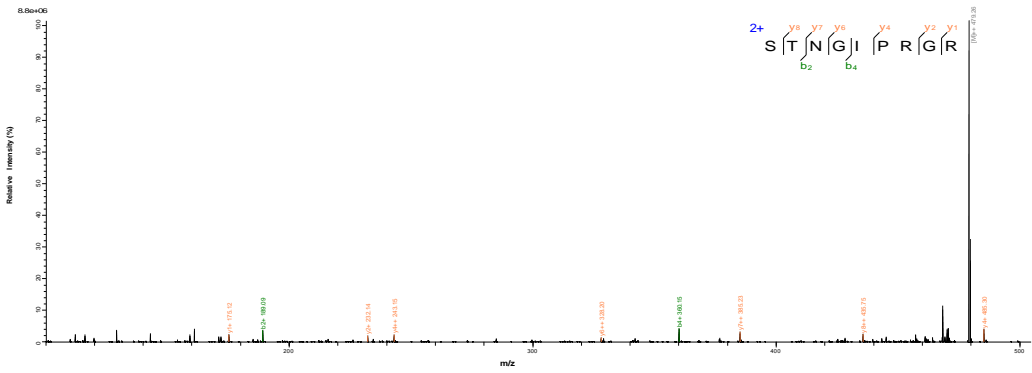

Heavy-labelled peptide

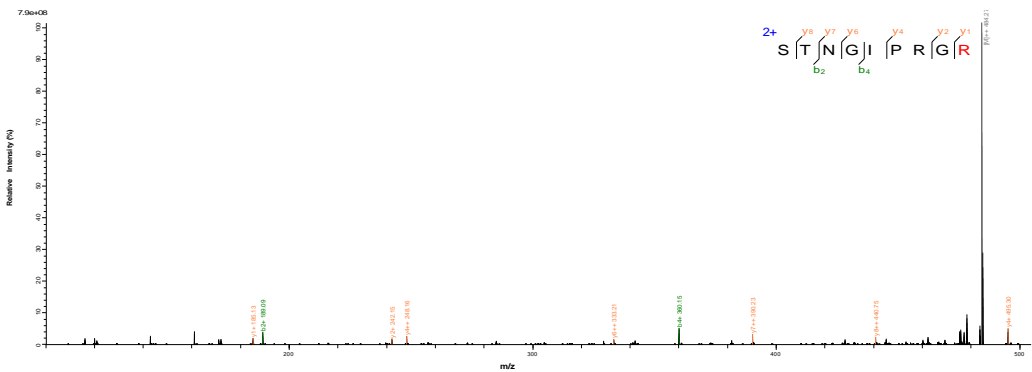

e

GAS7/T1185B

Peptide: EAWNGPPSAGR

Precursor charge: ++

QC

PRM1

PRM2

Light peptide

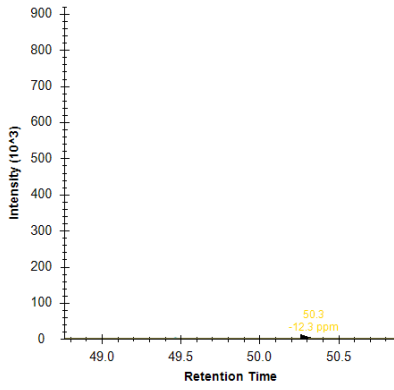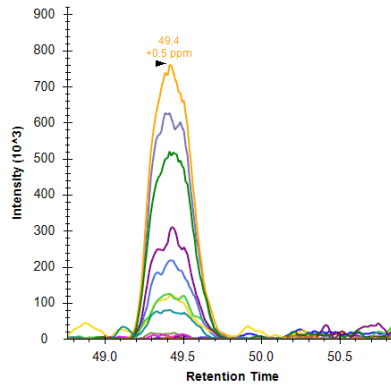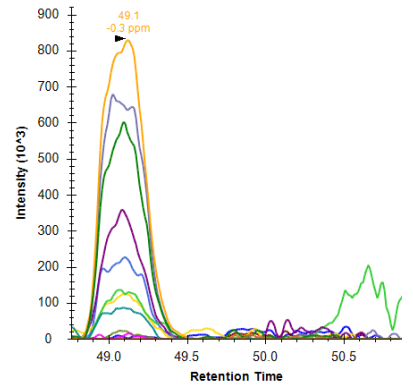

Heavy-labelled peptide

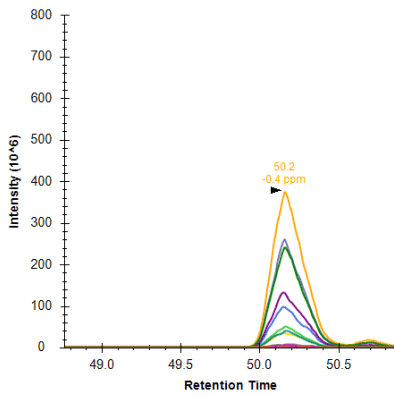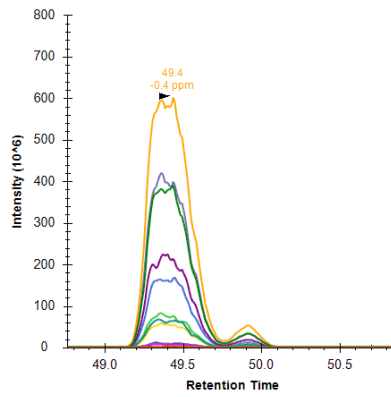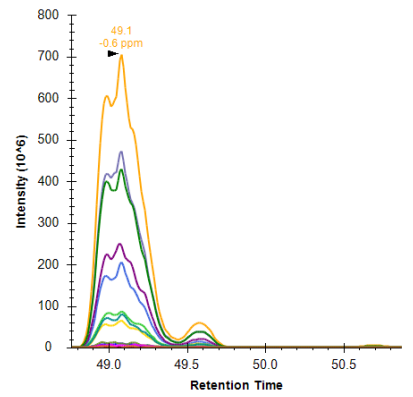

Light peptide

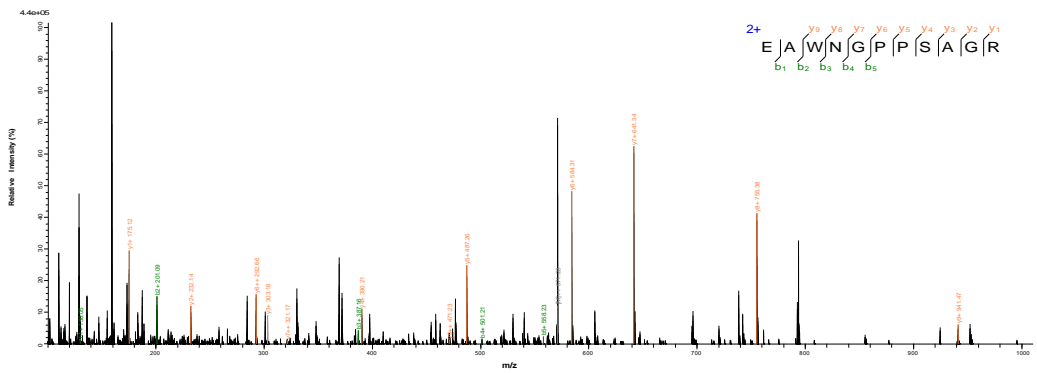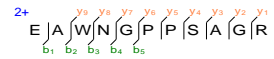

Heavy-labelled peptide

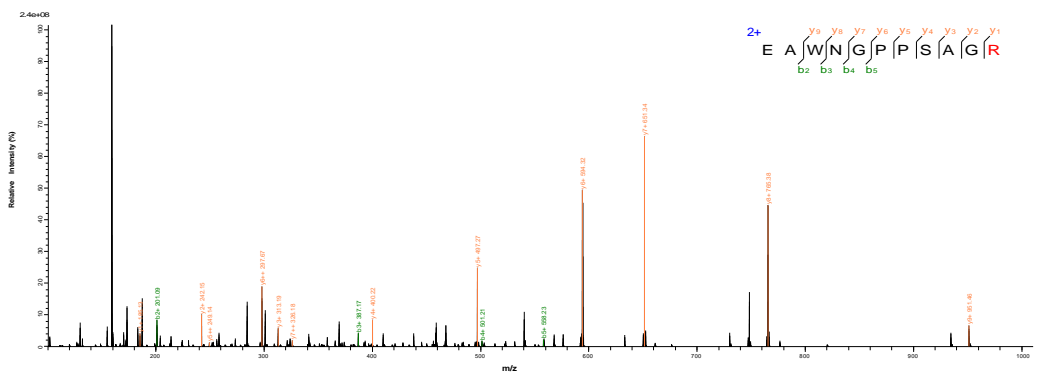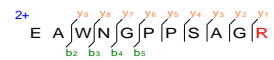

f

KIAA0226/T1185B

Peptide: SSITGLSVTR

Precursor charge: ++

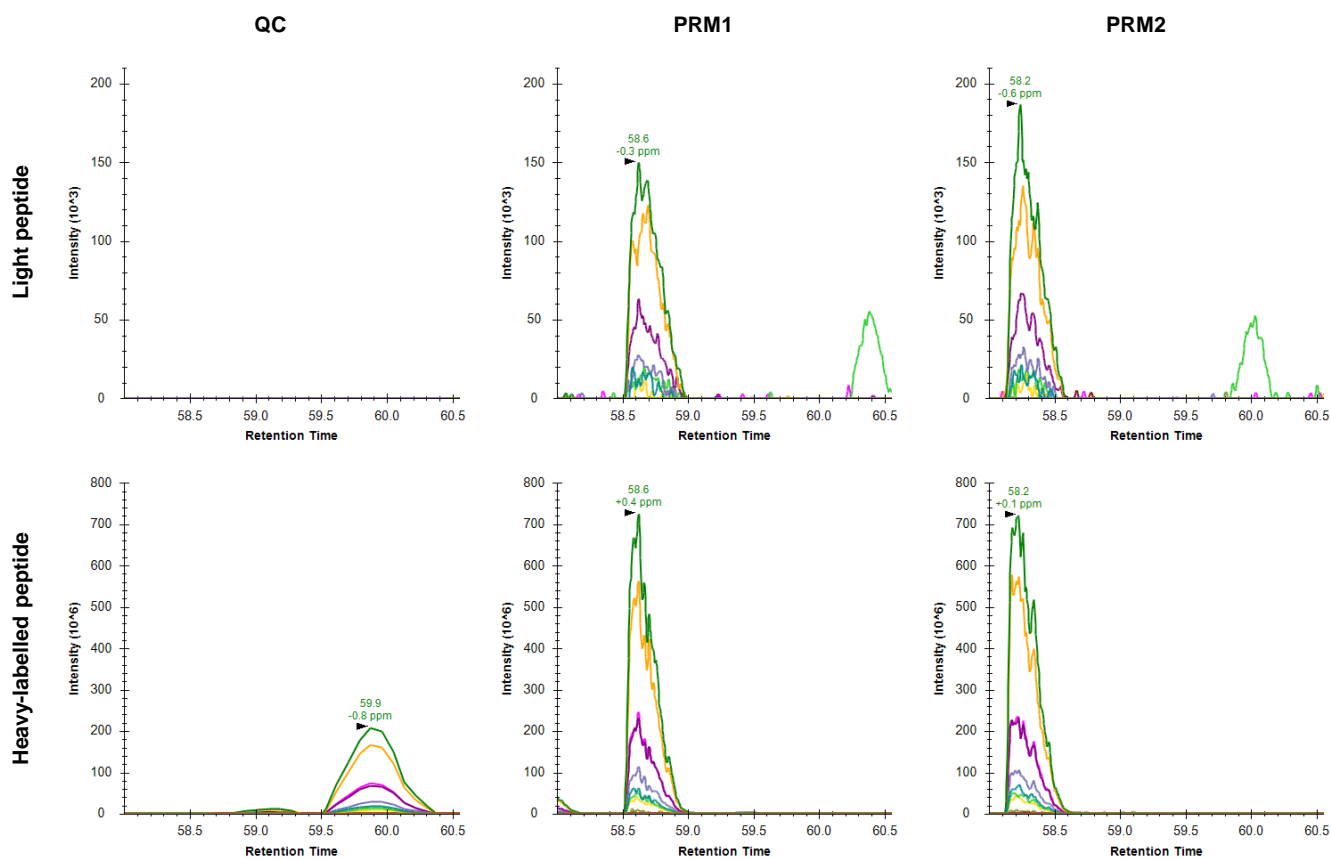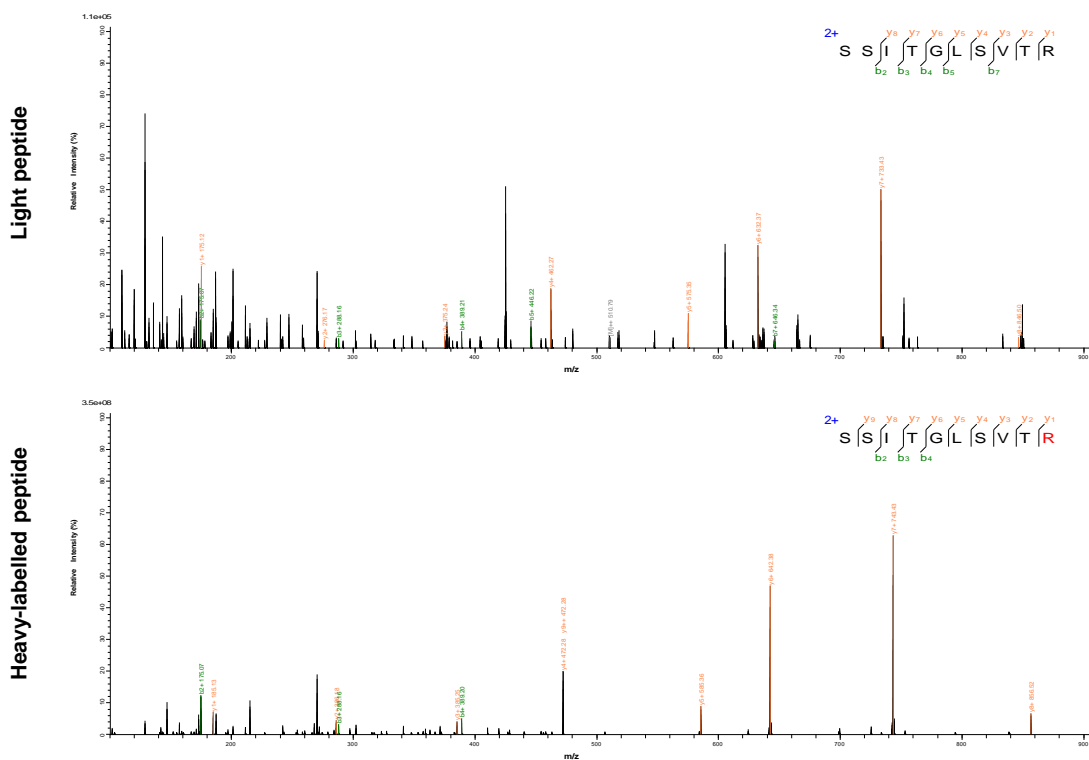



LINC00221/T1185B

Peptide: EAAAAFRFPR

Precursor charge: +++

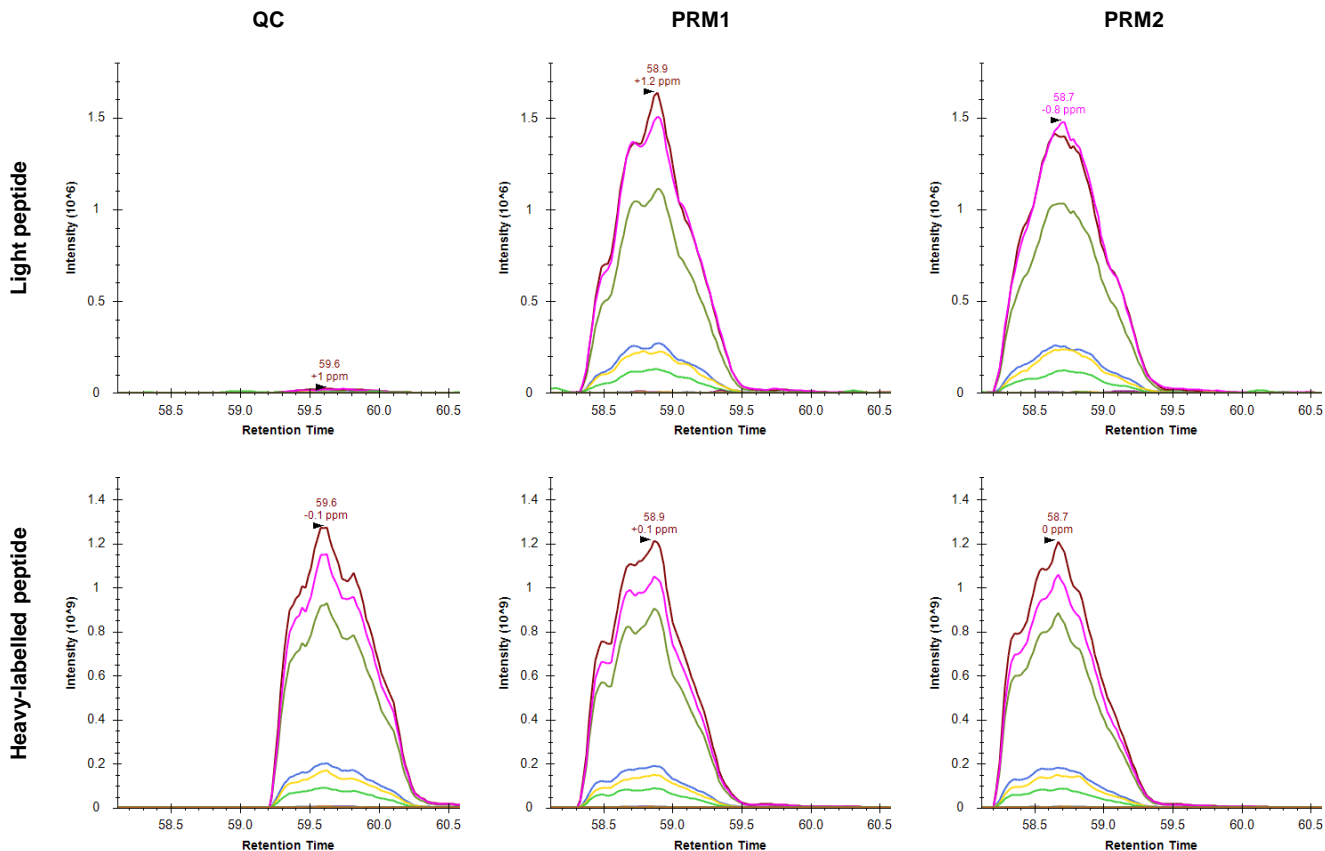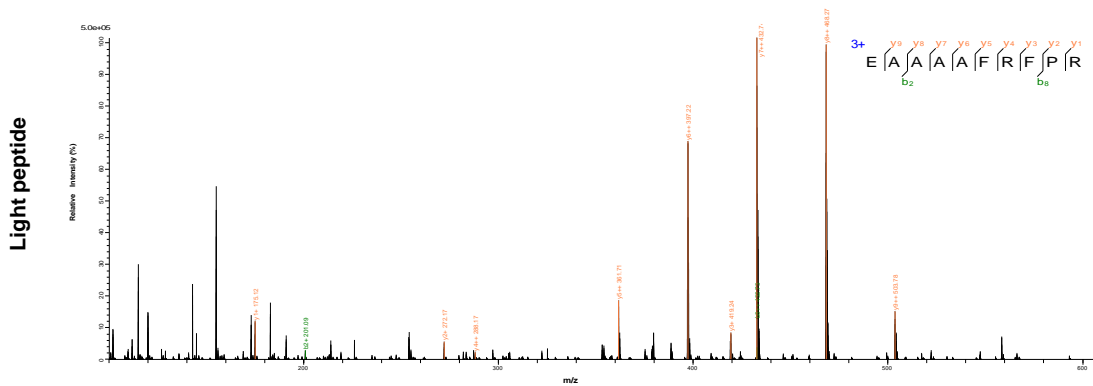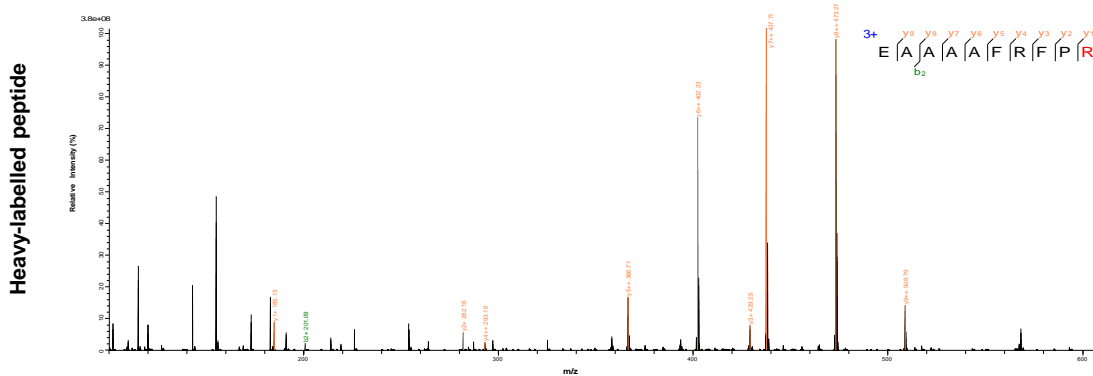

h

CTNNB1/Mel-1

Peptide: RVFEVYHTTVLK

Precursor charge: ++

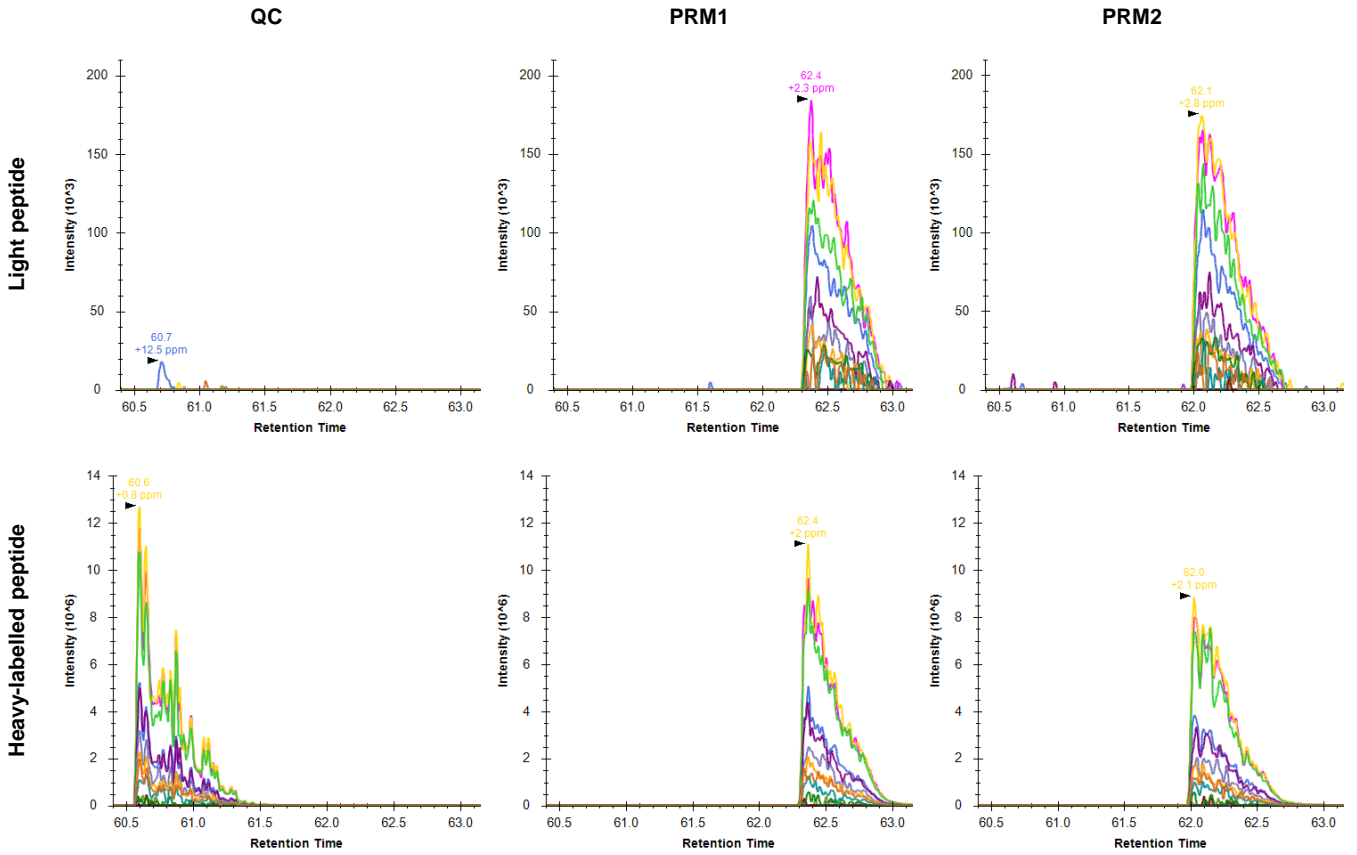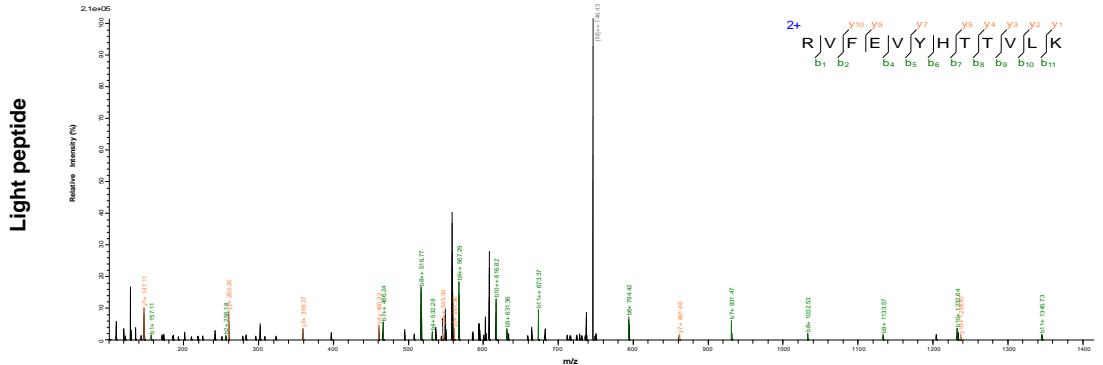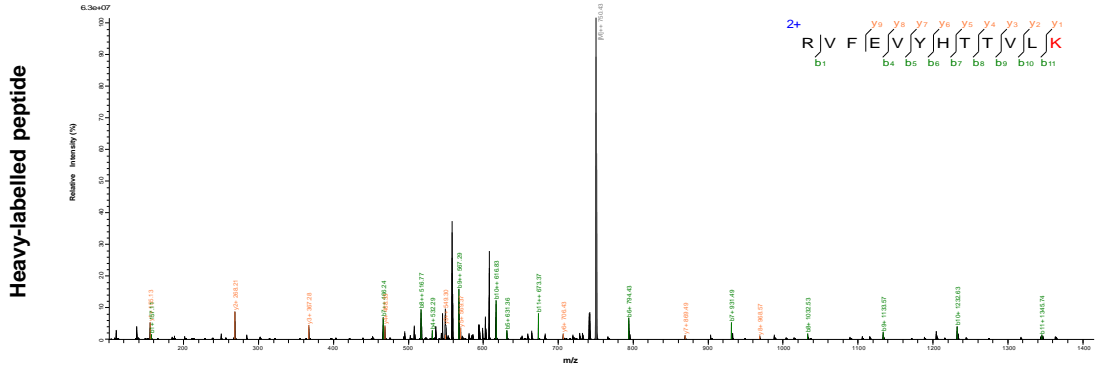



j

TOPBP1/Mel-1

Peptide: KSLAAELLVLK

Precursor charge: ++

QC

PRM1

PRM2

Light peptide

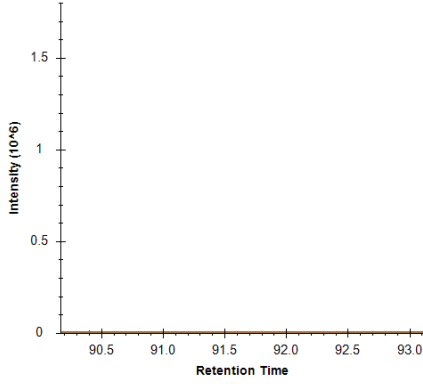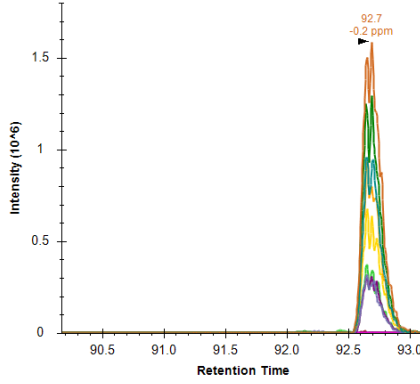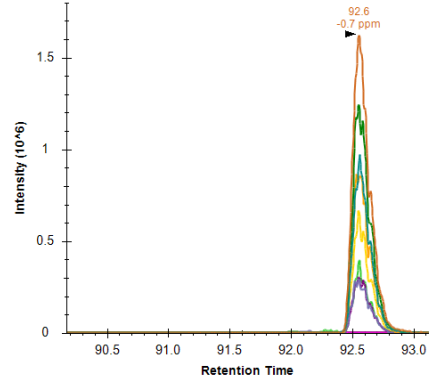

Heavy-labelled peptide

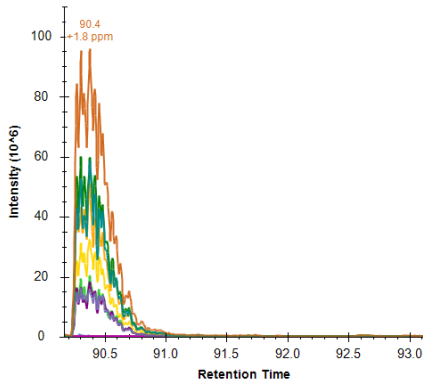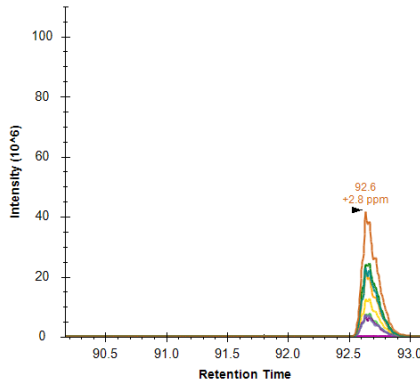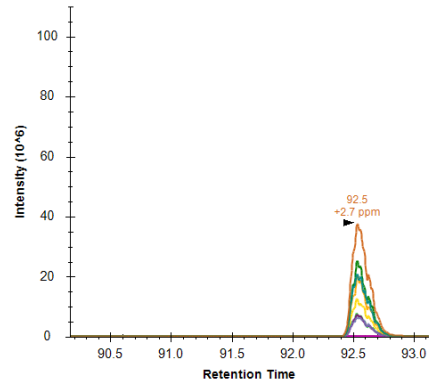

Light peptide

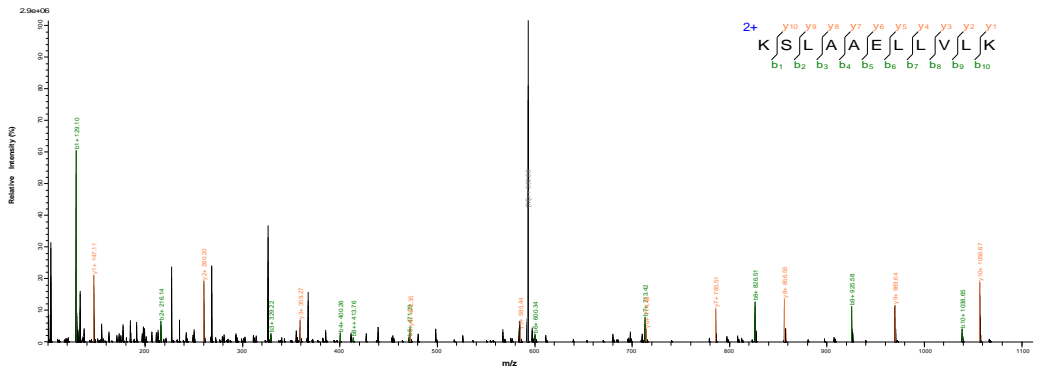

Heavy-labelled peptide

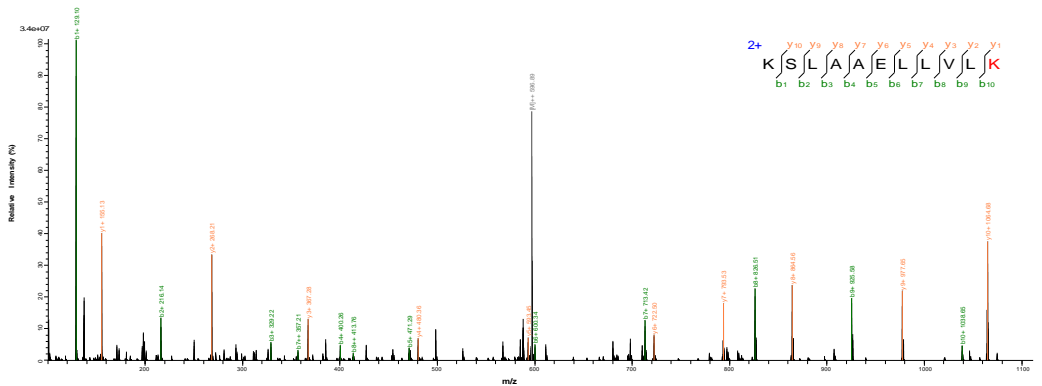

**k****ZMYM4/Mel-1****Peptide: RVVVSWIQK****Precursor charge: ++**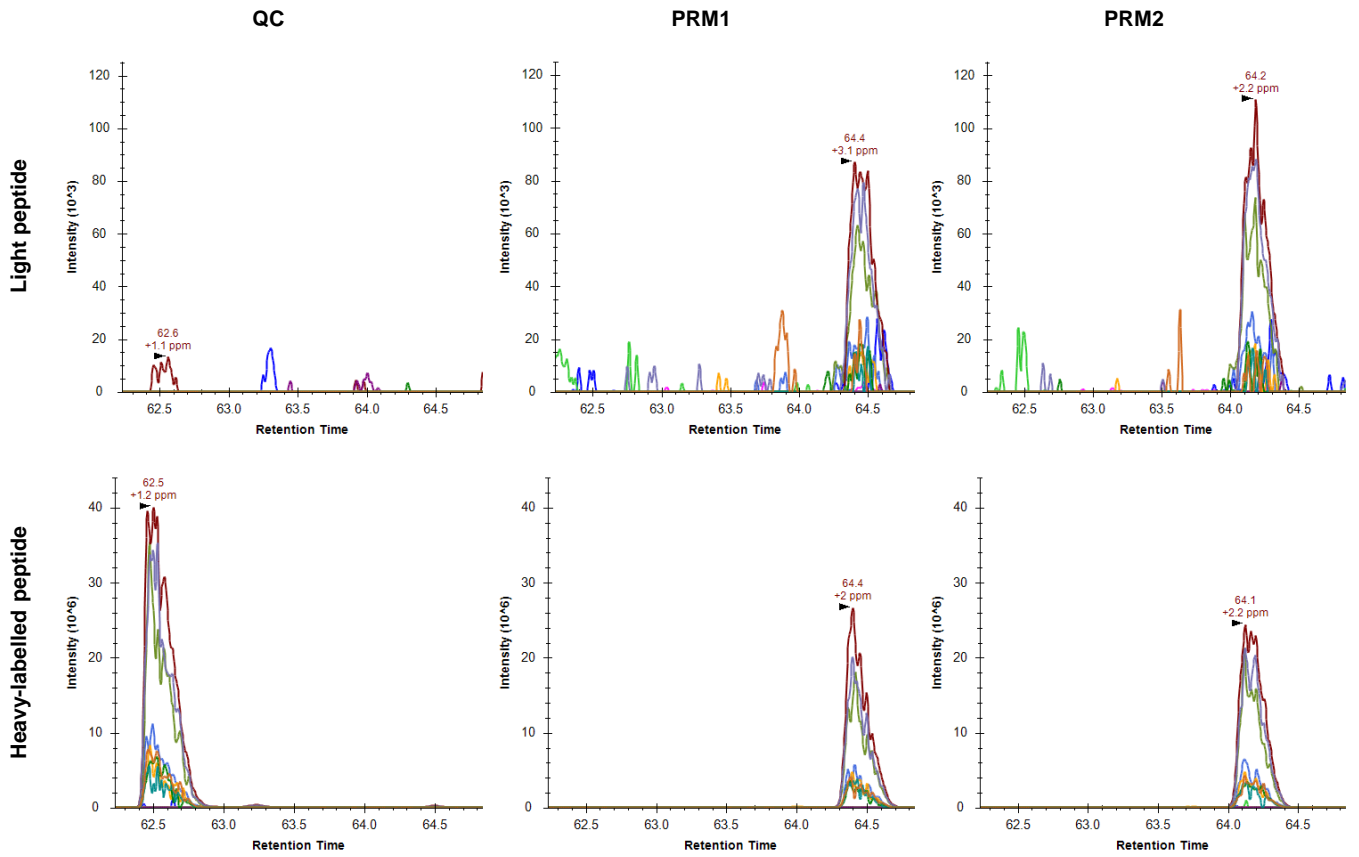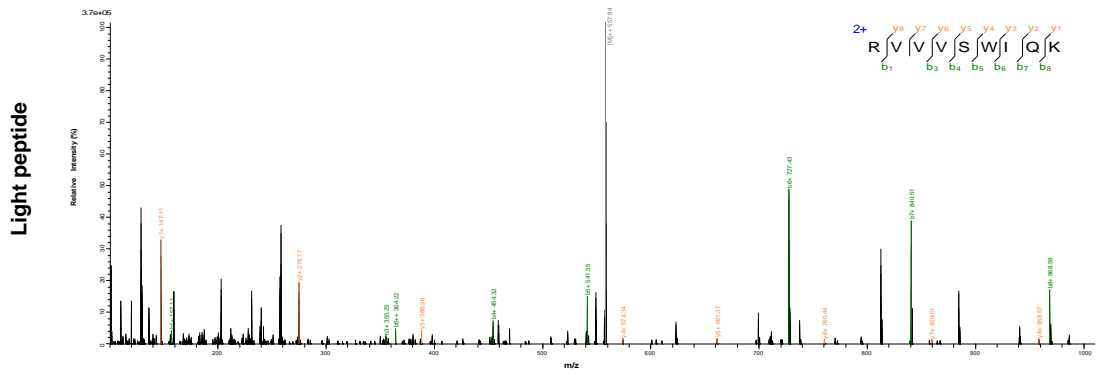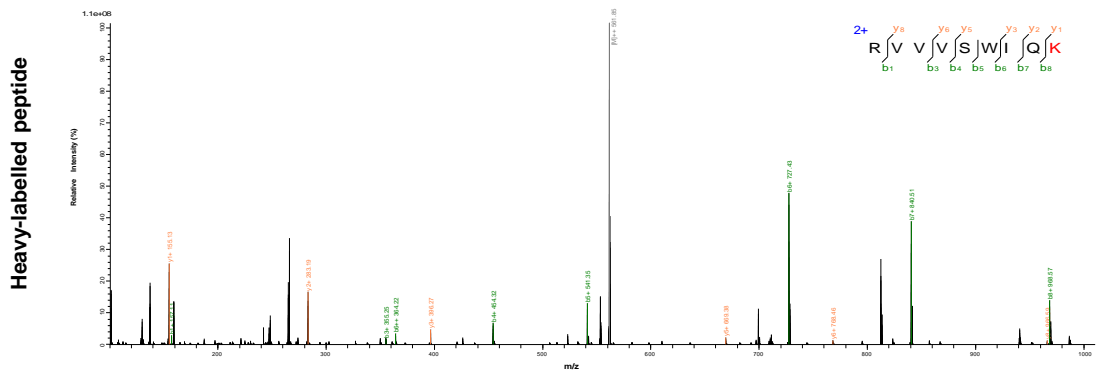

CDC73 (canonical)/T1185B

Peptide: ATENIPVRR

Precursor charge: +++

QC

PRM1

PRM2

Light peptide

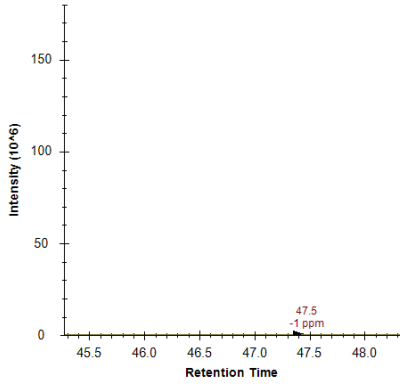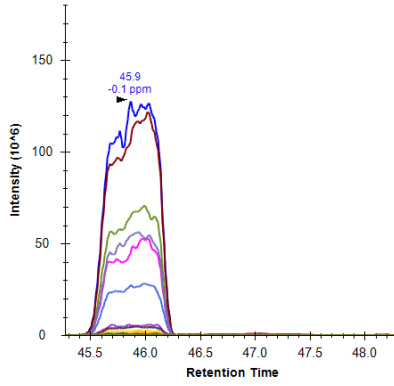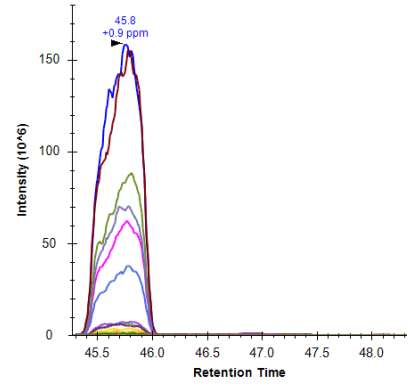

Heavy-labelled peptide

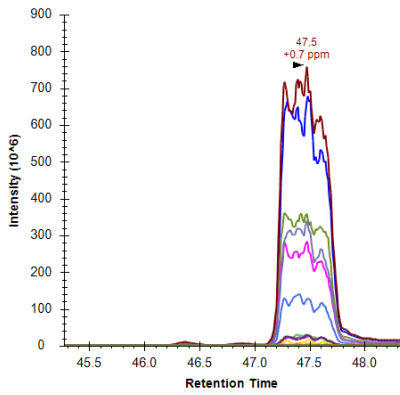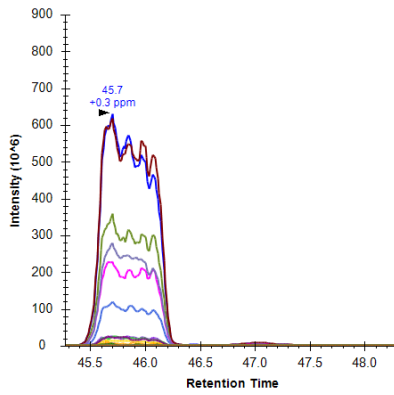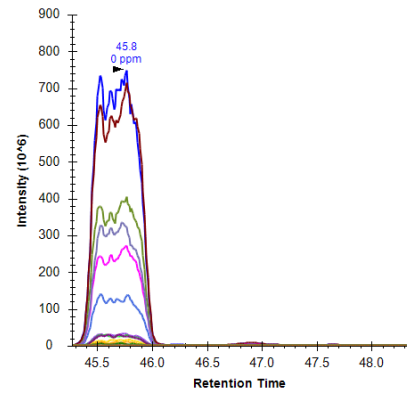

Light peptide

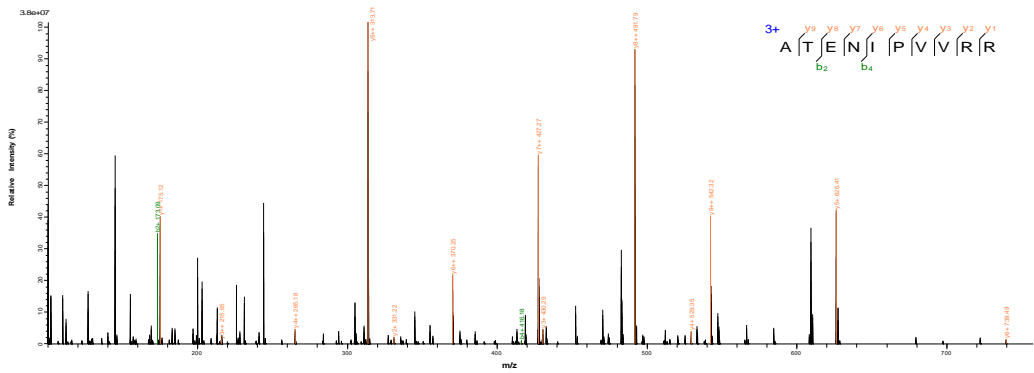

Heavy-labelled peptide

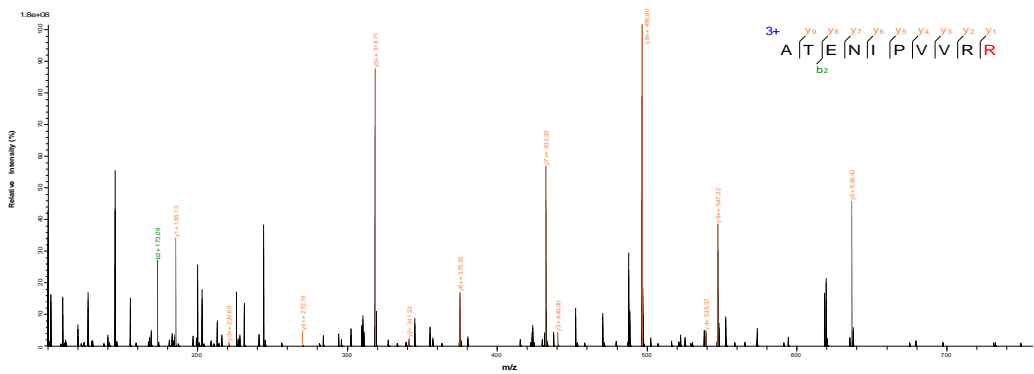

m

CDC73 (canonical)/T1185B

Peptide: SVTEGASAR

Precursor charge: ++

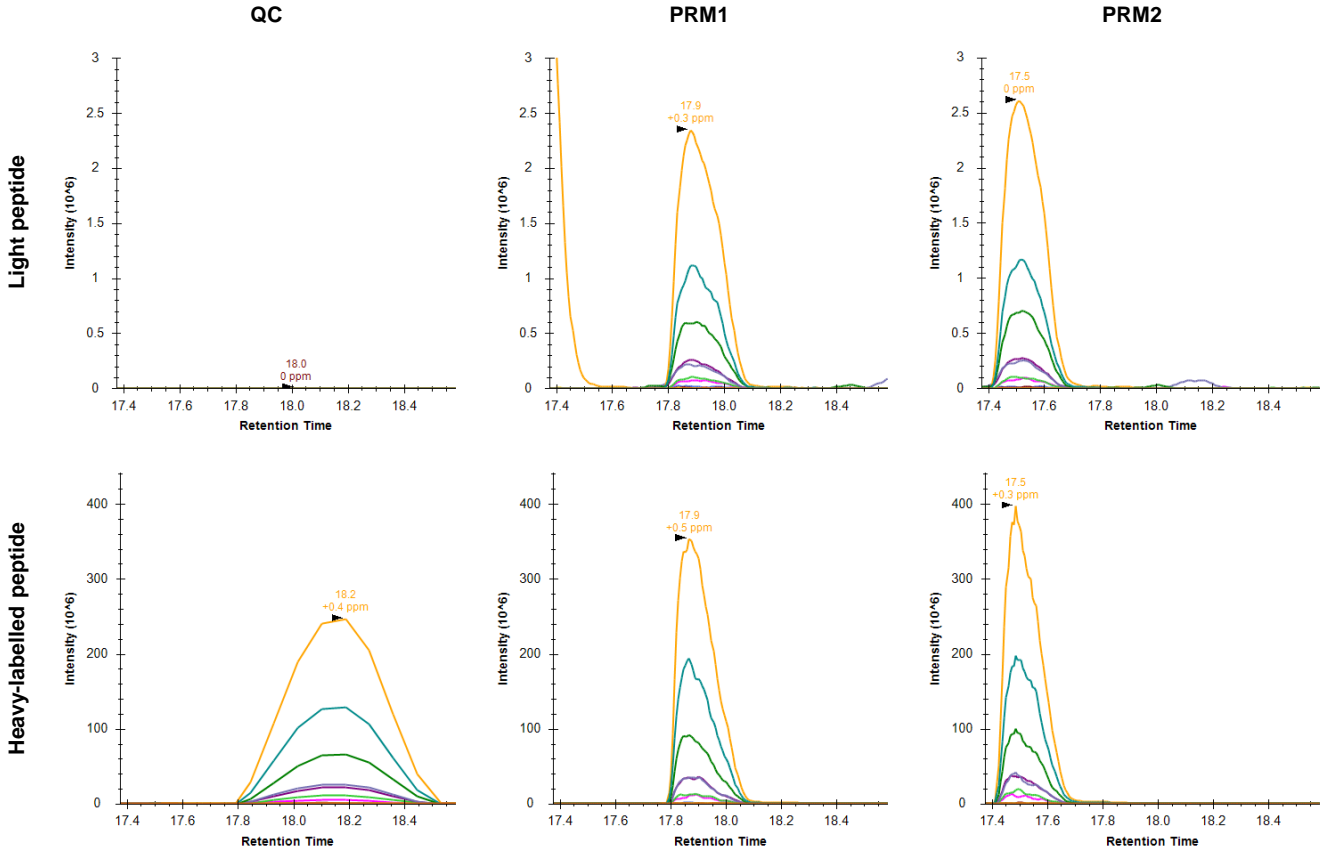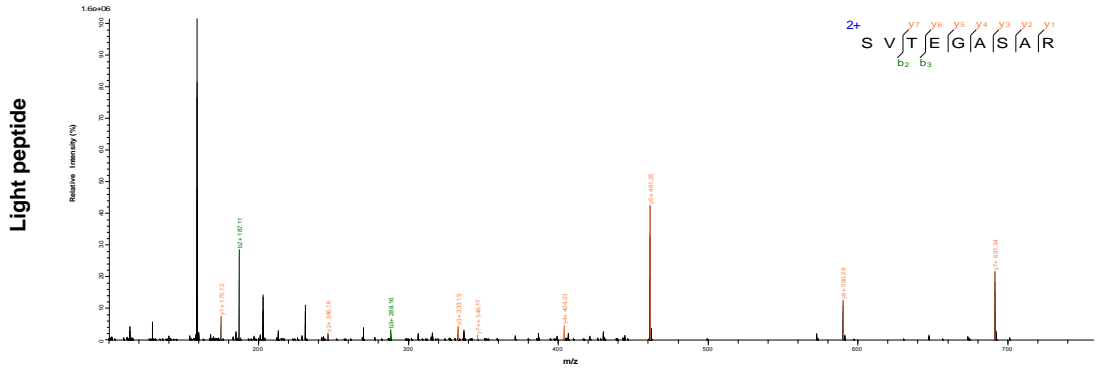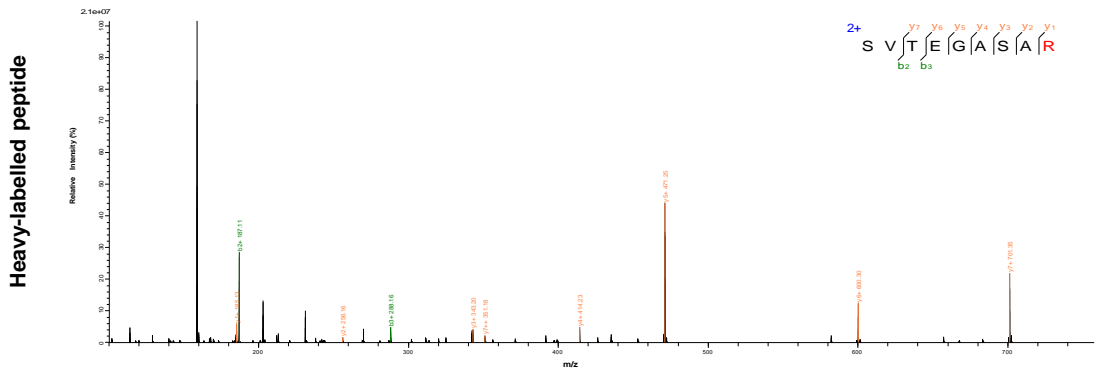

**Supplementary Figure 4. PRM validation of selected circRNA-derived peptides identified in T1185B and Mel-1 samples.** Skyline and pLabel showing the co-elution and MS/MS fragmentation patterns of light (above) and heavy-labelled (below) peptides, respectively. Visualization of MS-detected circRNA-derived peptides from host genes (a) *COP1* (*RFWD2*), (b) *CDC73*, (c) *CTNNB1* (T1185B), (d) *CTSB*, (e) *GAS7*, (f) *KIAA0226*, (g) *LINC00221*, (h) *CTNNB1* (Mel-1), (i) *PPP2R3A*, (j) *TOPBP1* and (k) *ZMYM4*. (l, m) Visualization of two MS-detected canonical peptides from *CDC73* in T1185B. Corresponding cell line and precursor charge are shown per each peptide. PRM1 and PRM2 represent technical replicates. Heavy labelled amino acid in each synthetic peptide is shown in bold.



**a**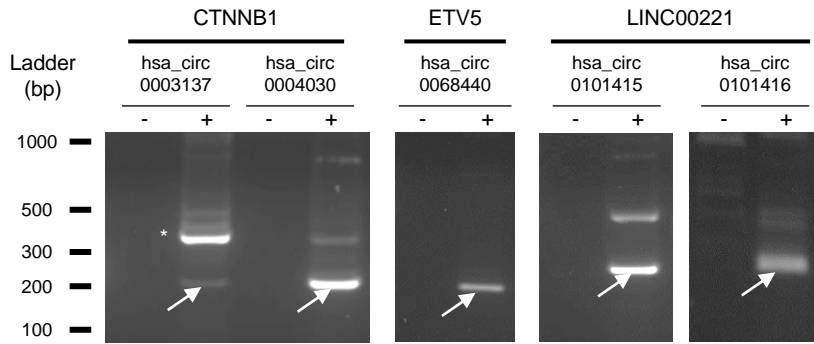

\*Note: Intense band 300-500bp was sequenced.

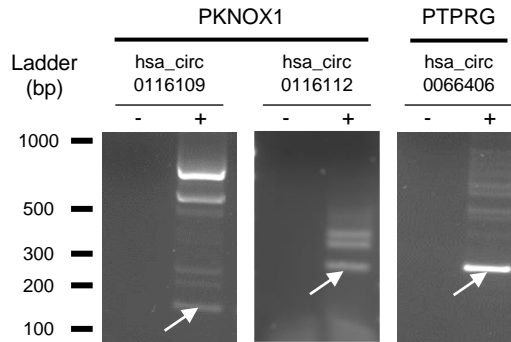**b**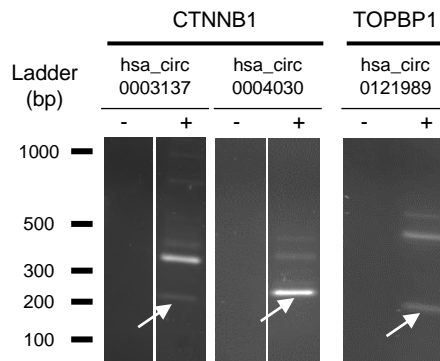

**Supplementary Figure 5. Divergent RT-PCR for circRNA validation.** (a) T1185B cell line. Agarose gel electrophoresis showing the expected size amplicons (arrows). Oligos used for RT-PCR amplification were designed to not overlap the BSJ (region aimed to be sequenced). Expectedly, several unspecificities were observed. RT-PCR amplification of the sequence containing the BSJ of *hsa\_circ0003137* showed an intense band (300-500bp). Sanger sequencing showed that the amplification corresponded to *hsa\_circ\_0004194*. CircRNAs hosted by *CTNNB1*, *ETV5*, *LINC00221*, *PKNOX1* and *PTPRG* genes were validated by divergent RT-PCR followed by Sanger Sequencing. “-”: water; “+”: T1185B-derived cDNA. (b) Mel-1 cell line. Agarose gel electrophoresis showing the expected size amplicons (arrows) for circRNAs hosted by *CTNNB1* and *TOPBP1* genes. Non-adjacent lanes corresponding to the negative controls (water) of the two circRNA amplicons from *CTNNB1* host gene, in Mel-1 cell line, derived from the same gel and they are shown separately. Remaining electrophoresis from T1185B cell line are shown in Fig. 2i (*COP1/RFWD2* host gene) and Fig. 3d (*CDC73* host gene). Images were adjusted for better visibility. This experiment was performed once. “-”: water; “+”: Mel-1-derived cDNA. Source data are provided as a Source Data file.

**a** Peptide: RVFEVYHTTVLK  
 Host gene: CTNNB1  
 circRNA: hsa\_circ\_0003137  
 Expected sequence around the [BSJ]: AGCTTATGGCAACCAAGAAAGCAA[GG]GTATTTGAAGTATACCATACT

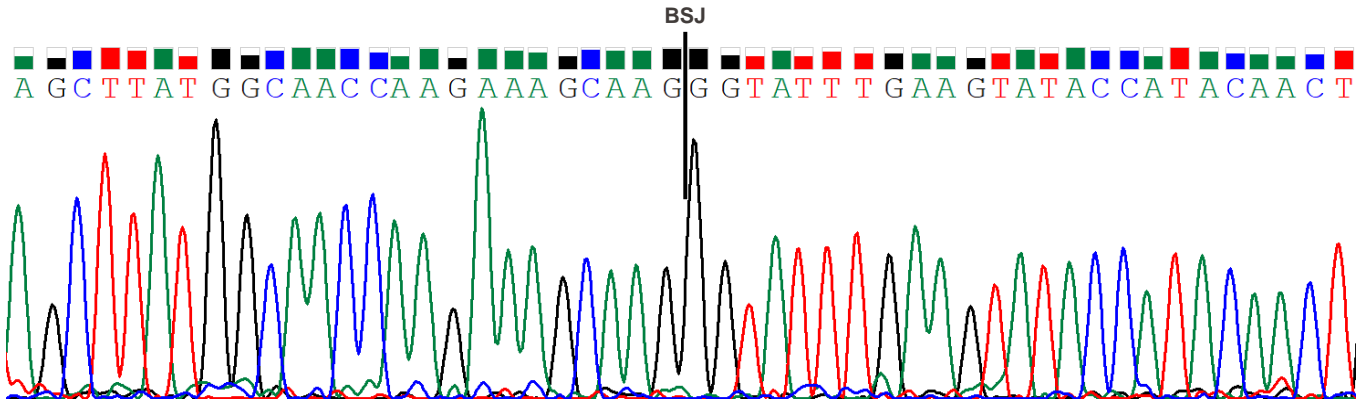

**b** Peptide: RVFEVYHTTVLK  
 Host gene: CTNNB1  
 circRNA: hsa\_circ\_0004030  
 Expected sequence around the [BSJ]: TACTGACCTGTAATCATCCTTTA[GG]GTATTTGAAGTATACCATACT

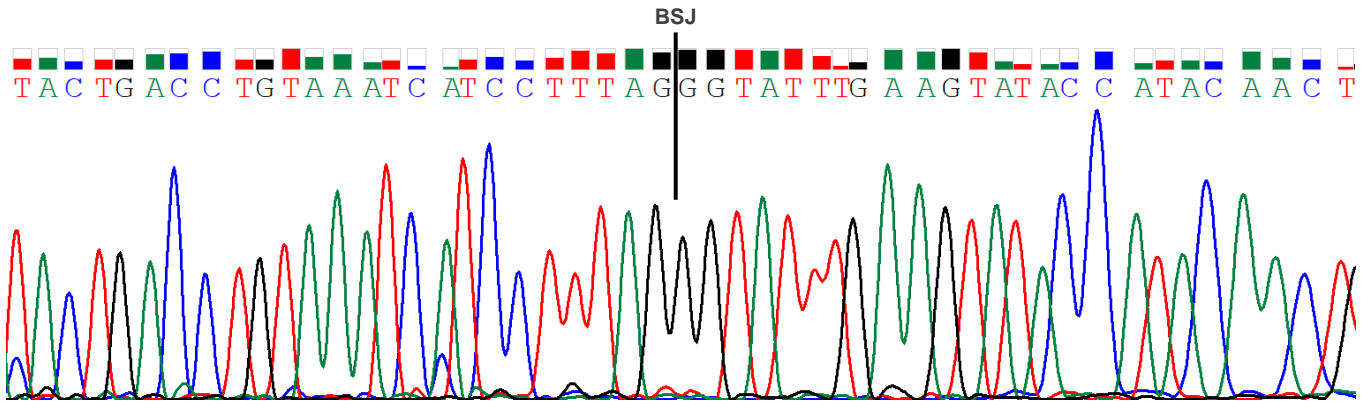

**c** Peptide: FVPDFQSDNR  
 Host gene: ETV5  
 circRNA: hsa\_circ\_0068440  
 Expected sequence around the [BSJ]: GTCCAGATTTTCA GTCTGATAAC[CG]AGGATCCCTTTTCCCCAGAAATT

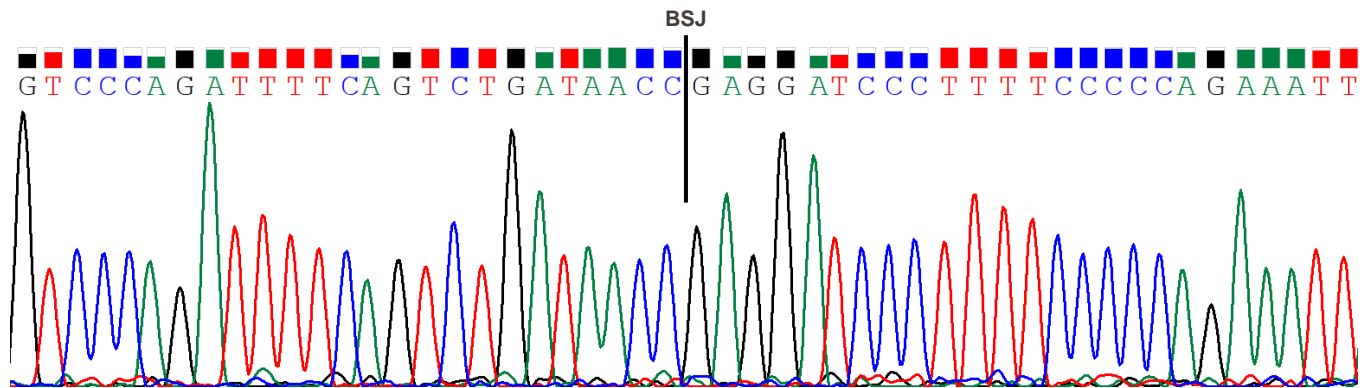

**d** Peptide: EAAAAFRFPR (not validated by PRM: AAAA FRFPR)  
 Host gene: LINC00221  
 circRNA: hsa\_circ\_0101415  
 Expected sequence around the [BSJ]: CCGCCGCTGCCTTCAGGTTTCCGA[GG]GACTTTTGTGCTGTGCTCACATA

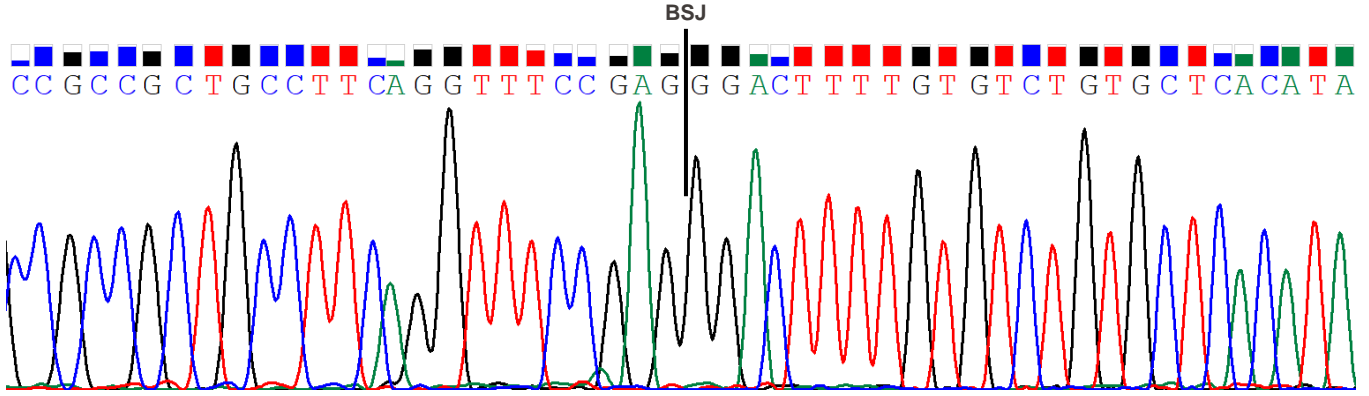

**e** Peptide: EAAAAFRFPR (not validated by PRM: AAAA FRFPR)  
 Host gene: LINC00221  
 circRNA: hsa\_circ\_0101416  
 Expected sequence around the [BSJ]: CCGCCGCTGCCTTCAGGTTTCCGA[GG]ATGTGAGGAAGTAGAACACACAC

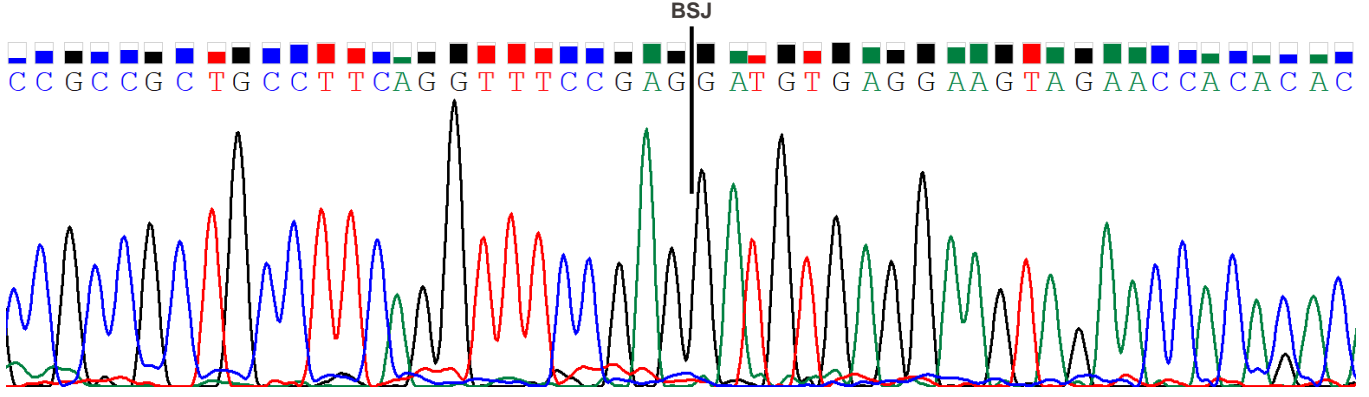

**f** Peptide: QTPFAFHPR  
 Host gene: PKNOX1  
 circRNA: hsa\_circ\_0116109  
 Expected sequence around the [BSJ]: CCCGTA CTCA C CAGTGCAGTCCCAGACACCATTCGC TTTT CACC CAAGAT

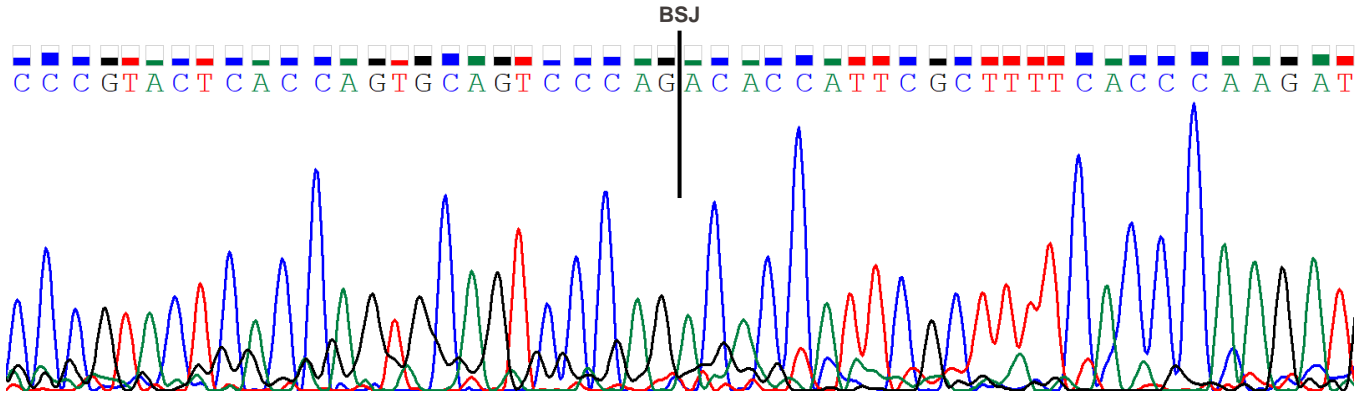

**g**

Peptide: QTPFAFHPR

Host gene: PKNOX1

circRNA: hsa\_circ\_0116112

Expected sequence around the [BSJ]: CGGGGCCACCCTGGCGGTGCAGCA[GA]CACCATTGCTTTTCACCCAAGAT

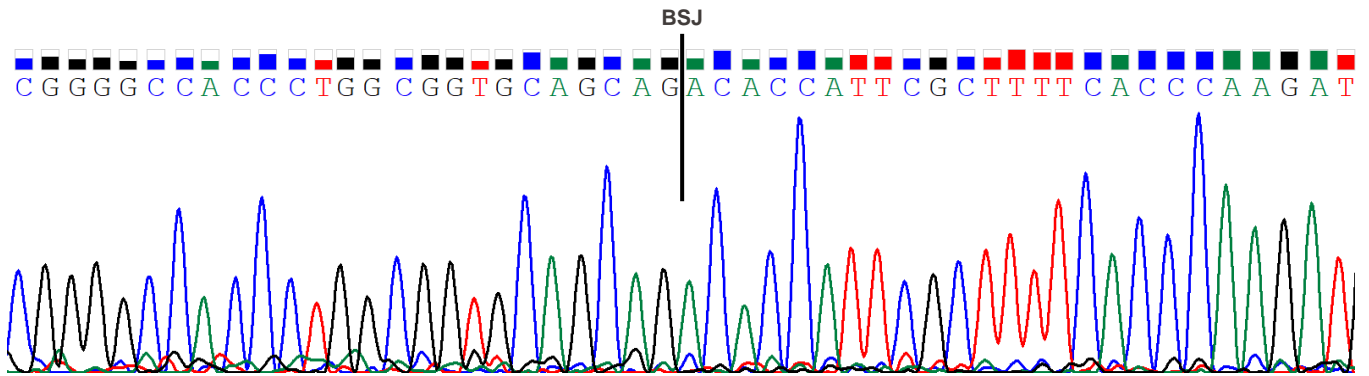**h**

Peptide: NTASMAGGFLLR

Host gene: PTPRG

circRNA: hsa\_circ\_0066406

Expected sequence around the [BSJ]: CAATGGCAGGAGGTTTCTGTTGA[GG]TGCCTATGGTCCTGAGCACTGGGT

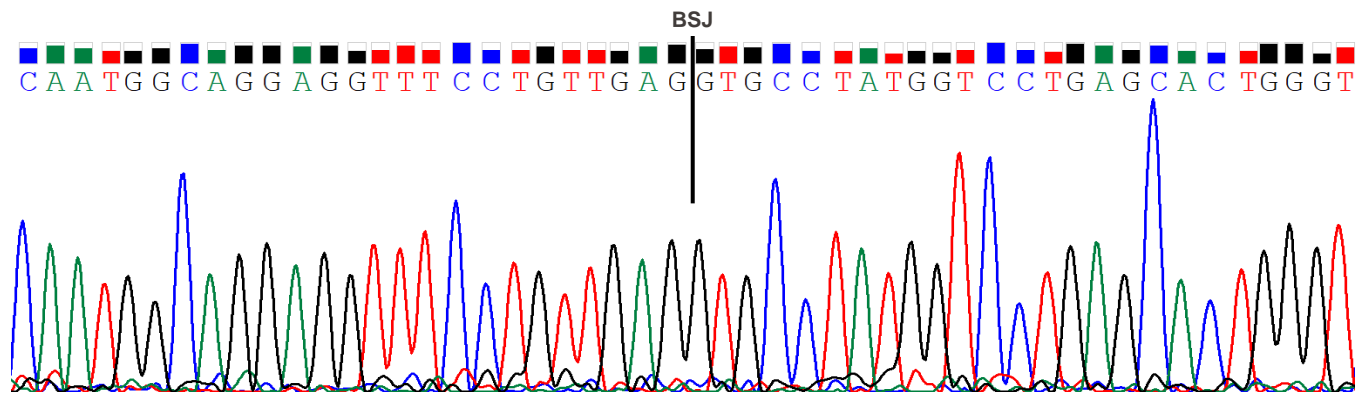**i**

Peptide: RVFEVYHTTVLK

Host gene: CTNNB1

circRNA: hsa\_circ\_0003137

Expected sequence around the [BSJ]: AGCTTATGGCAACCAAGAAAGCAA[GG]GTATTTGAAGTATACCAATACAACCT

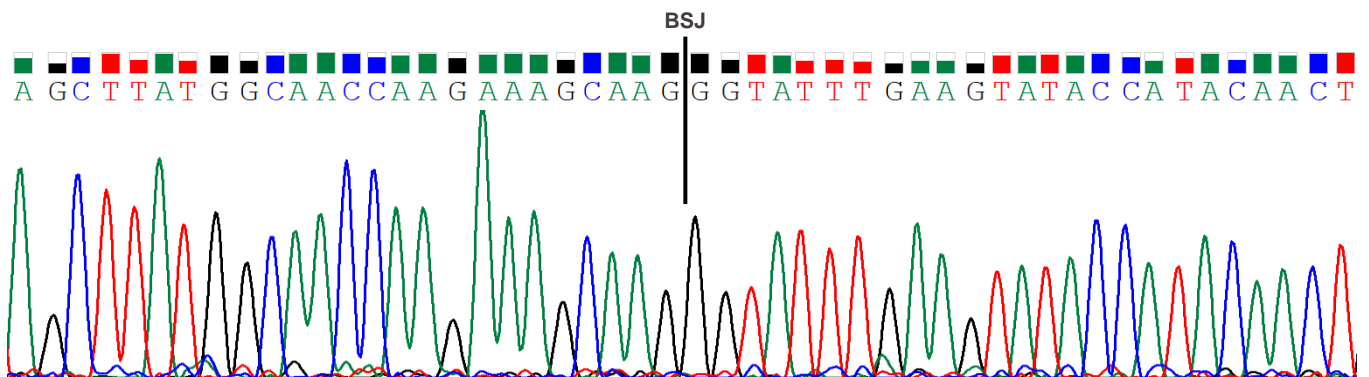

**j****Peptide:** RVFEVYHTTVLK**Host gene:** CTNNB1**circRNA:** hsa\_circ\_0004030**Expected sequence around the [BSJ]:** TACTGACCTGTAAATCATCCTTTA[GG]GTATTTGAAGTATACCATAACAAC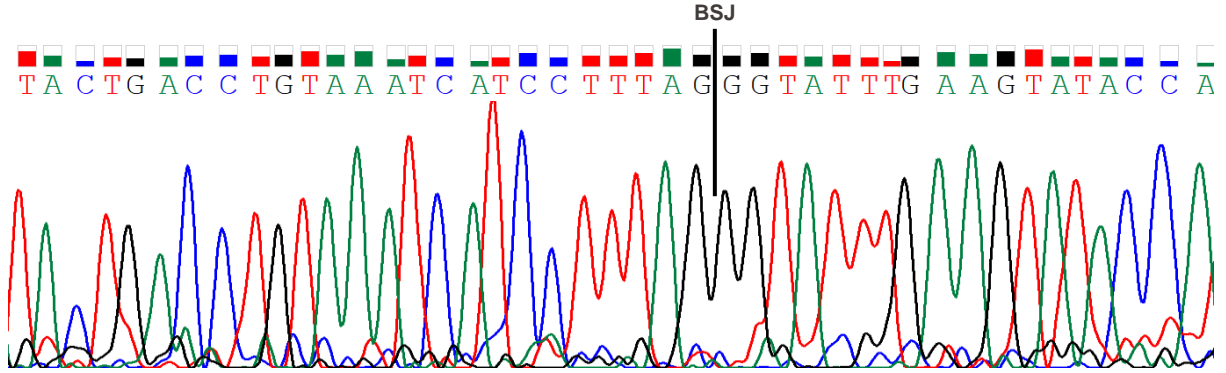**k****Peptide:** KSLAELLVLK**Host gene:** TOPBP1**circRNA:** hsa\_circ\_0121989**Expected sequence around the [BSJ]:** CACCTCATTGTGCAAGAACCAAAA[GC]TTGGCTGCAGAATTGTTGGTCCTC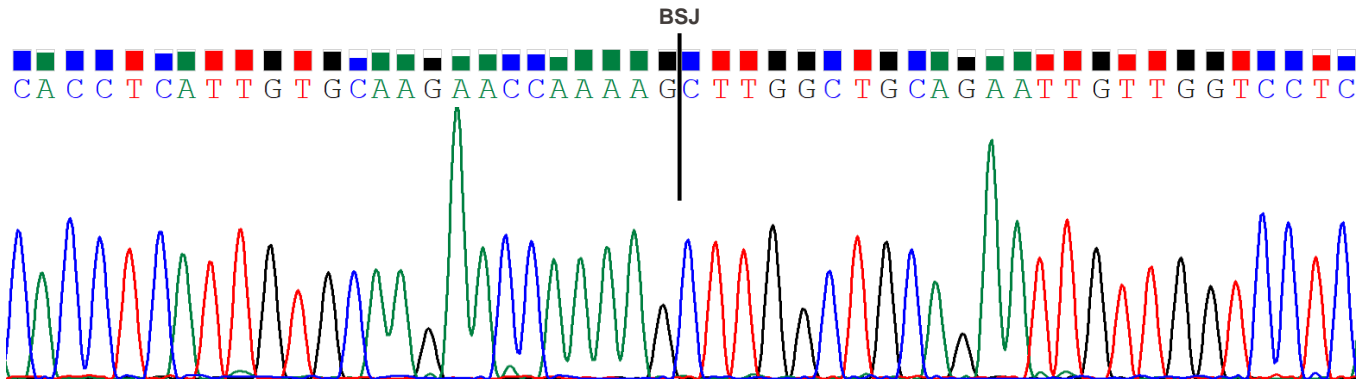**l****Extra band obtained during amplification of hsa\_circ0003137:****Host gene:** CTNNB1**circRNA:** hsa\_circ\_0004194 (known circRNA)**Expected sequence around the [BSJ]:** AATAAGCCGGCTATTGTAGAAGCT[GG]GTATTTGAAGTATACCATAACAAC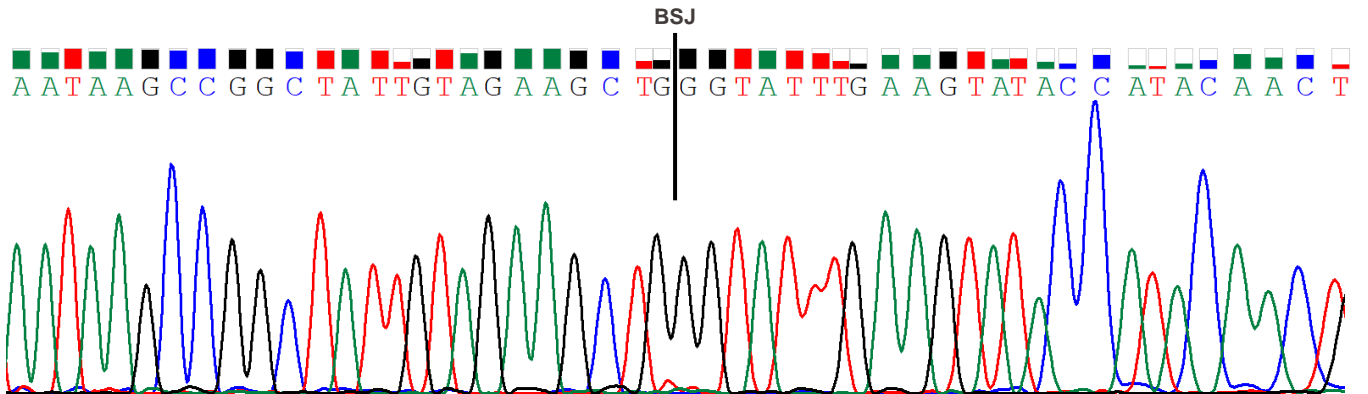

**Supplementary Figure 6. Sanger Sequencing validation in T1185B and Mel-1 cell lines.**

Following electrophoresis, bands with the expected size were purified and DNA was analyzed by direct Sanger Sequencing, validating the sequence overlapping the BSJ of (a) *hsa\_circ\_0003137* (*CTNNB1* in T1185B), (b) *hsa\_circ\_0004030* (*CTNNB1* in T1185B), (c) *hsa\_circ\_0068440* (*ETV5*), (d) *hsa\_circ\_0101415* (*LINC00221*), (e) *hsa\_circ\_0101416* (*LINC00221*), (f) *hsa\_circ\_0116109* (*PKNOX1*), (g) *hsa\_circ\_0116112* (*PKNOX1*), (h) *hsa\_circ\_0066406* (*PTPRG*), (i) *hsa\_circ\_0003137* (*CTNNB1* in Mel-1), (j) *hsa\_circ\_0004030* (*CTNNB1* in Mel-1), (k) *hsa\_circ\_0121989* (*TOPBP1* in Mel-1) and (l) *hsa\_circ\_0004194* (*CTNNB1* extra band in T1185B). Remaining Sanger Sequencing chromatograms from T1185B cell line are shown in Fig. 2j (*hsa\_circ\_0015366* and *hsa\_circ\_0111262*, *COP1/RFWD2*) and Fig. 3e (*hsa\_circ\_0111569*, *CDC73*).

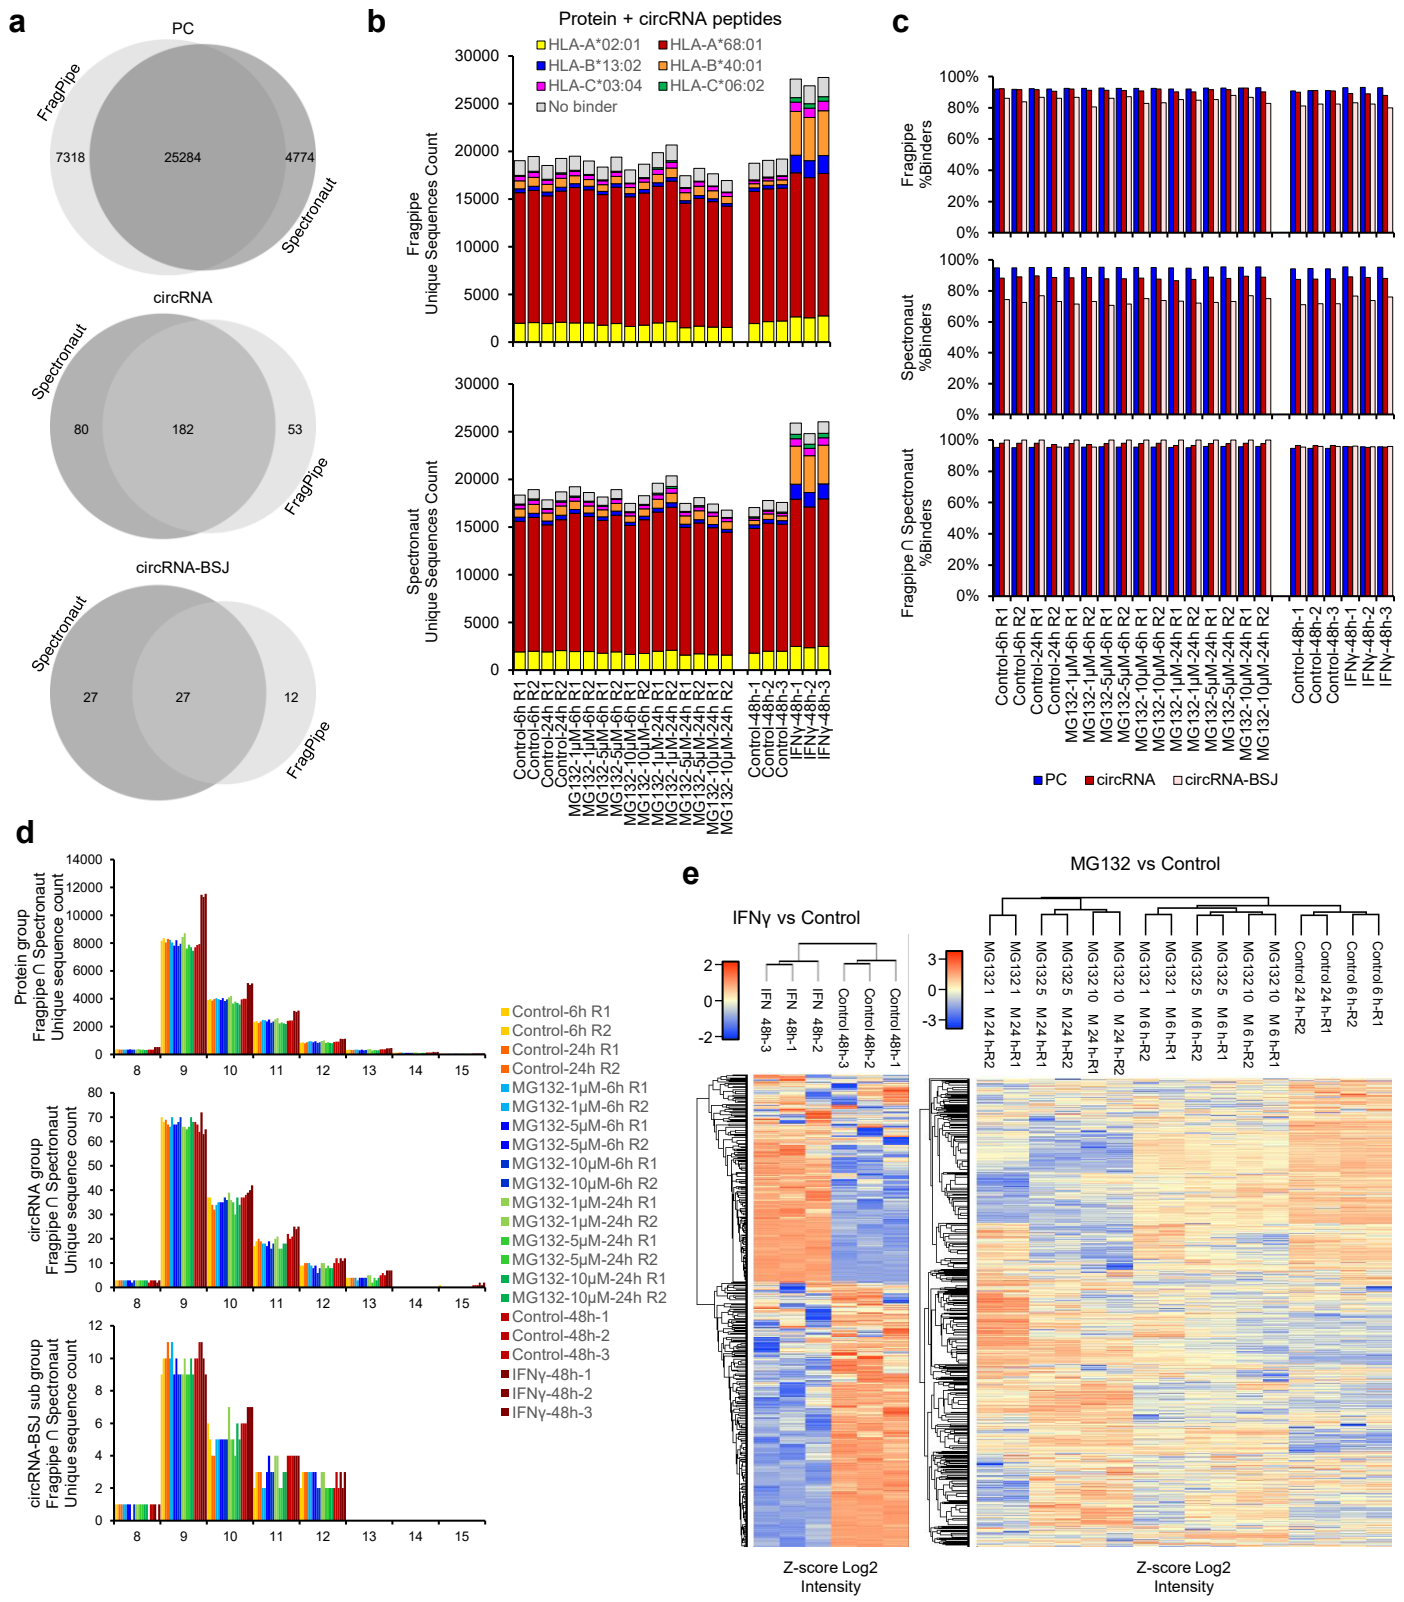

**Supplementary Figure 7. IFN $\gamma$  and MG132 treatments in T1185B cell line.** (a) Venn diagrams show the intersection between the unique peptide sequences detected in FragPipe (group-specific FDR 0.03) and Spectronaut (FDR 0.01), using a hybrid DIA approach. Illustration was done for PC, circRNA, and circRNA-BSJ groups. (b) Total number of unique peptides identified by FragPipe (top) and Spectronaut (bottom) in each sample, colored based on their predicted HLA restriction. (c) Percentage (%) of peptides predicted as HLA binders (% rank < 2) in each sample, using NetMHCpan, annotated in the PC, circRNA, and circRNA-BSJ groups, for FragPipe (top), Spectronaut (middle) and their intersection (bottom). (d) Length distribution of the common identified peptides in FragPipe and Spectronaut among PC, circRNA, and circRNA-BSJ groups. (e) Hierarchical clustering heat-maps showing the Z-score Log<sub>2</sub> intensity of the peptides following IFN $\gamma$  or MG132 treatments. Source data are provided as a Source Data file.

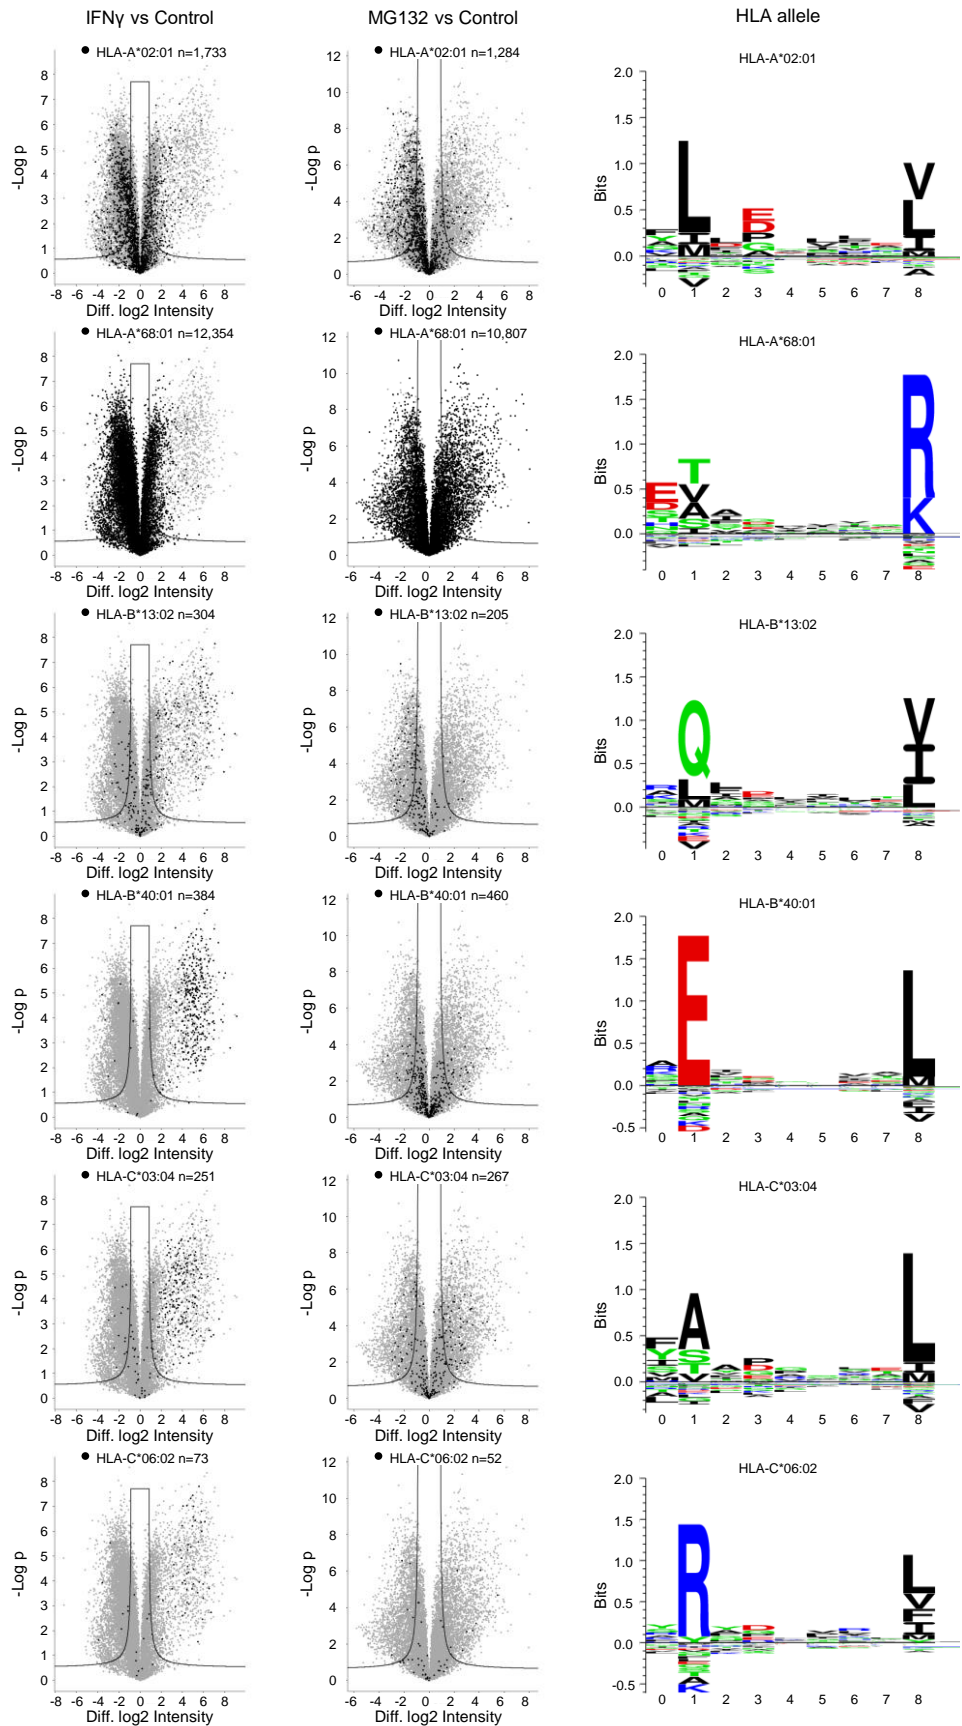

**Supplementary Figure 8. Effect of IFN $\gamma$  and MG132 in the intensity of peptides per binder allele.** Volcano plots highlighting the peptides associated to each HLA-I allele in black (best binder allele). HLA allele binding motifs based on Mass-Spectrometry Eluted Ligands (EL) are shown on the right of the volcano plots (derived from NetMHCpan - 4.1). Source data are provided as a Source Data file.



**a**

| Host Gene    | circRNA          | Peptide         | 2287 |   |   |   | 2288 |   |   |   | 2289 |   |   |   | 2290 |   |   |   | 2671 |   |   |   | 2672 |   |   |   | 3023 |   |   |   | 3421 |   |   |   |   |   |   |
|--------------|------------------|-----------------|------|---|---|---|------|---|---|---|------|---|---|---|------|---|---|---|------|---|---|---|------|---|---|---|------|---|---|---|------|---|---|---|---|---|---|
|              |                  |                 | H    | T | T | T | T    | H | T | T | T    | T | H | T | T    | T | T | H | T    | T | T | T | H    | T | T | T | T    | H | T | T | T    | T | H | T | T | T | T |
| ABCC1        | hsa_circ_0038107 | KRQPVKVVY       |      |   |   |   |      |   |   |   |      |   |   |   |      |   |   |   |      |   |   |   |      |   |   |   |      |   |   |   |      |   |   |   |   |   |   |
| ANKRD10      | hsa_circ_0030908 | VANGAHVEI       |      |   |   |   |      |   |   |   |      |   |   |   |      |   |   |   |      |   |   |   |      |   |   |   |      |   |   |   |      |   |   |   |   |   |   |
| BABAM1       | hsa_circ_0049967 | TFNYLPGPV       |      |   |   |   |      |   |   |   |      |   |   |   |      |   |   |   |      |   |   |   |      |   |   |   |      |   |   |   |      |   |   |   |   |   |   |
| CTNNB1       | hsa_circ_0003137 | RVFEVYHTTVLK    |      |   |   |   |      |   |   |   |      |   |   |   |      |   |   |   |      |   |   |   |      |   |   |   |      |   |   |   |      |   |   |   |   |   |   |
|              | hsa_circ_0004030 |                 |      |   |   |   |      |   |   |   |      |   |   |   |      |   |   |   |      |   |   |   |      |   |   |   |      |   |   |   |      |   |   |   |   |   |   |
| EIF4B        | hsa_circ_0026498 | DRAKKNNKKGKTISL |      |   |   |   |      |   |   |   |      |   |   |   |      |   |   |   |      |   |   |   |      |   |   |   |      |   |   |   |      |   |   |   |   |   |   |
| HSP90AB1     | hsa_circ_0076651 | ILDKKVEKL       |      |   |   |   |      |   |   |   |      |   |   |   |      |   |   |   |      |   |   |   |      |   |   |   |      |   |   |   |      |   |   |   |   |   |   |
| LIAS         | hsa_circ_0069480 | ETVPELQR        |      |   |   |   |      |   |   |   |      |   |   |   |      |   |   |   |      |   |   |   |      |   |   |   |      |   |   |   |      |   |   |   |   |   |   |
| MALAT1       | hsa_circ_0096124 | KLLHGVKNVFK     |      |   |   |   |      |   |   |   |      |   |   |   |      |   |   |   |      |   |   |   |      |   |   |   |      |   |   |   |      |   |   |   |   |   |   |
| NFKB1        | hsa_circ_0070531 | TSPLSSKL        |      |   |   |   |      |   |   |   |      |   |   |   |      |   |   |   |      |   |   |   |      |   |   |   |      |   |   |   |      |   |   |   |   |   |   |
| NPLOC4       | hsa_circ_0046209 | FTEAETHSY       |      |   |   |   |      |   |   |   |      |   |   |   |      |   |   |   |      |   |   |   |      |   |   |   |      |   |   |   |      |   |   |   |   |   |   |
| PPP2R3A      | hsa_circ_0122039 | KVLSFTEK        |      |   |   |   |      |   |   |   |      |   |   |   |      |   |   |   |      |   |   |   |      |   |   |   |      |   |   |   |      |   |   |   |   |   |   |
| PTPRG        | hsa_circ_0066402 | ASM(Ox)AGGFLLR  |      |   |   |   |      |   |   |   |      |   |   |   |      |   |   |   |      |   |   |   |      |   |   |   |      |   |   |   |      |   |   |   |   |   |   |
|              | hsa_circ_0066406 |                 |      |   |   |   |      |   |   |   |      |   |   |   |      |   |   |   |      |   |   |   |      |   |   |   |      |   |   |   |      |   |   |   |   |   |   |
|              | hsa_circ_0124401 |                 |      |   |   |   |      |   |   |   |      |   |   |   |      |   |   |   |      |   |   |   |      |   |   |   |      |   |   |   |      |   |   |   |   |   |   |
| SAE1         | hsa_circ_0051662 | ILAQEIVKV       |      |   |   |   |      |   |   |   |      |   |   |   |      |   |   |   |      |   |   |   |      |   |   |   |      |   |   |   |      |   |   |   |   |   |   |
| SCRN1        | hsa_circ_0079683 | SALTFQSTK       |      |   |   |   |      |   |   |   |      |   |   |   |      |   |   |   |      |   |   |   |      |   |   |   |      |   |   |   |      |   |   |   |   |   |   |
| SNX6         | hsa_circ_0008747 | SELFDKTRLK      |      |   |   |   |      |   |   |   |      |   |   |   |      |   |   |   |      |   |   |   |      |   |   |   |      |   |   |   |      |   |   |   |   |   |   |
| TOPBP1       | hsa_circ_0121989 | KSLAELLVLK      |      |   |   |   |      |   |   |   |      |   |   |   |      |   |   |   |      |   |   |   |      |   |   |   |      |   |   |   |      |   |   |   |   |   |   |
| YAP1         | hsa_circ_0004881 | KTSSGQRYFLK     |      |   |   |   |      |   |   |   |      |   |   |   |      |   |   |   |      |   |   |   |      |   |   |   |      |   |   |   |      |   |   |   |   |   |   |
| ZMYM4        | hsa_circ_0113154 | RVVVSWIQK       |      |   |   |   |      |   |   |   |      |   |   |   |      |   |   |   |      |   |   |   |      |   |   |   |      |   |   |   |      |   |   |   |   |   |   |
| (Intergenic) | hsa_circ_0140588 | DIRKKFLR        |      |   |   |   |      |   |   |   |      |   |   |   |      |   |   |   |      |   |   |   |      |   |   |   |      |   |   |   |      |   |   |   |   |   |   |

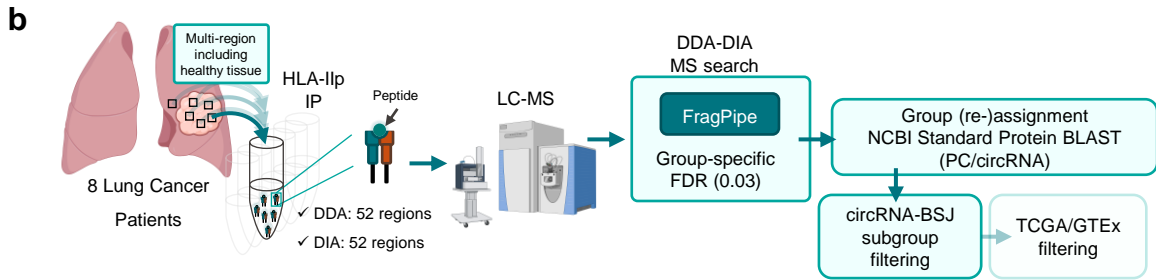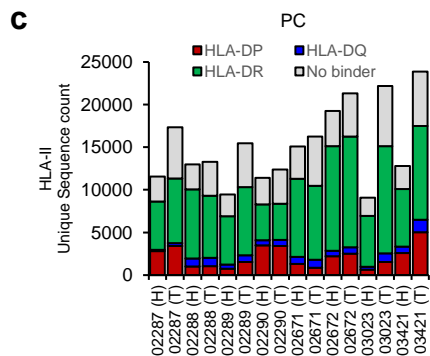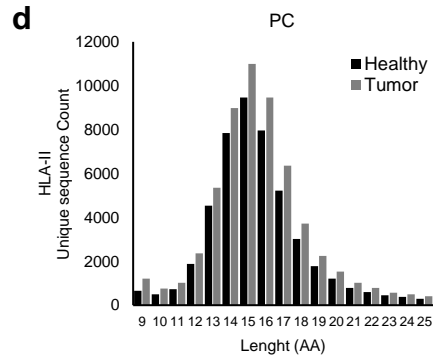

**e**

| Host gene | circRNA          | Peptide          | 2287 |   |   |   | 2288 |   |   |   | 2289 |   |   |   | 2290 |   |   |   | 2671 |   |   |   | 2672 |   |   |   | 3023 |   |   |   | 3421 |   |   |   |   |   |   |
|-----------|------------------|------------------|------|---|---|---|------|---|---|---|------|---|---|---|------|---|---|---|------|---|---|---|------|---|---|---|------|---|---|---|------|---|---|---|---|---|---|
|           |                  |                  | H    | T | T | T | T    | H | T | T | T    | T | H | T | T    | T | T | H | T    | T | T | T | H    | T | T | T | T    | H | T | T | T    | T | H | T | T | T | T |
| LDLR      | hsa_circ_0049380 | KPRAIVDPVHGFG    |      |   |   |   |      |   |   |   |      |   |   |   |      |   |   |   |      |   |   |   |      |   |   |   |      |   |   |   |      |   |   |   |   |   |   |
| RBM10     | hsa_circ_0090380 | TADAGYAILEKKASQG |      |   |   |   |      |   |   |   |      |   |   |   |      |   |   |   |      |   |   |   |      |   |   |   |      |   |   |   |      |   |   |   |   |   |   |

**Supplementary Figure 9. Detection of circRNA-BSJ derived peptides across multi-region lung cancer and healthy tissues in eight patients.** (a) Identification of HLA-I peptides across the samples. (b) Workflow used to explore HLA-II immunopeptidomics DDA and DIA MS data of 8 lung cancer patients, including 52 tumoral and healthy matched tissues. MS raw files were analyzed by a DDA-DIA approach with FragPipe, applying a group-specific FDR threshold of 0.03 for protein-derived and circRNA-derived peptides groups. circRNA-derived peptides were blasted against a larger Reference Proteins database to re-assign matching peptides to the protein (PC) group. Schema was partially created with BioRender.com. (c) Unique peptide count and (d) length distribution of the protein-derived HLA-II immunopeptidome in healthy (H) and tumor (T) tissues. (e) Identification of circRNA-BSJ derived HLA-II peptides across samples. Black square: detected peptide; white square: not detected peptide; grey square: no data. Source data are provided as a Source Data file.

**Supplementary Table 1.** List of the synthetic heavy-labelled peptides correspondent to the validated targets.

| Host gene                  | Peptide Sequence      | Nterm | Cterm | MW        | Cell line | #Cells                  | Spike-in (pmol/uL) |
|----------------------------|-----------------------|-------|-------|-----------|-----------|-------------------------|--------------------|
| <i>CDC73</i>               | TTENIPV <b>V</b> RR   | [H]   | [OH]  | 1194.284  | T1185B    | 2x10 <sup>8</sup> cells | 1                  |
| <i>CTNNB1</i>              | RVFEVYHTT <b>V</b> LK | [H]   | [OH]  | 1499.6896 | T1185B    | 1x10 <sup>8</sup> cells | 1                  |
|                            |                       |       |       |           | Mel-1     | 1x10 <sup>8</sup> cells | 1                  |
| <i>CTSB</i>                | STNGIPRGR             | [H]   | [OH]  | 967.06    | T1185B    | 1x10 <sup>8</sup> cells | 0.5                |
| <i>GAS7</i>                | EAWNGPPS <b>A</b> GR  | [H]   | [OH]  | 1151.1312 | T1185B    | 1x10 <sup>8</sup> cells | 0.5                |
| <i>KIAA0226</i>            | SSITGLSV <b>T</b> R   | [H]   | [OH]  | 1030.0738 | T1185B    | 1x10 <sup>8</sup> cells | 0.5                |
| <i>LINC00221</i>           | EAAAAFR <b>F</b> PR   | [H]   | [OH]  | 1145.3    | T1185B    | 1x10 <sup>8</sup> cells | 0.5                |
| <i>RFWD2</i>               | DLYNGSSIV <b>S</b> R  | [H]   | [OH]  | 1220.31   | T1185B    | 2x10 <sup>8</sup> cells | 1                  |
| <i>PPP2R3A</i>             | KVSLSF <b>T</b> EK    | [H]   | [OH]  | 1046.1452 | Mel-1     | 1x10 <sup>8</sup> cells | 1                  |
| <i>TOPBP1</i>              | KSLAAELL <b>V</b> LK  | [H]   | [OH]  | 1192.4211 | Mel-1     | 1x10 <sup>8</sup> cells | 1                  |
| <i>ZMYM4</i>               | RVVVSWIQ <b>K</b>     | [H]   | [OH]  | 1122.2923 | Mel-1     | 1x10 <sup>8</sup> cells | 1                  |
| <i>CDC73</i> (linear mRNA) | ATENIPV <b>V</b> RR   | [H]   | [OH]  | 1164.2577 | T1185B    | 2x10 <sup>8</sup> cells | 1                  |
|                            | SVTEGAS <b>A</b> R    | [H]   | [OH]  | 886.8448  | T1185B    | 1x10 <sup>8</sup> cells | 1                  |

Note: Position of the heavy-labelled amino acid is indicated in bold.

**Supplementary Table 2.** List of oligos used for divergent PCR/ Sanger Sequencing.

| Host gene        | circRNA                 | Forward Oligo          | Reverse Oligo           | PCR product (bp) | Sequencing Oligo        |
|------------------|-------------------------|------------------------|-------------------------|------------------|-------------------------|
| <i>CDC73</i>     | <i>hsa_circ_0111569</i> | GCACCTGTGGATCCCACTTT   | ATACTTGCCGATGTTGACGC    | 239              | ATACTTGCCGATGTTGACGC    |
| <i>CTNNB1</i>    | <i>hsa_circ_0003137</i> | GGAGCTAAAATGGCAGTGCG   | ACTCCATCAAATCAGCTTGAGTA | 211              | GGAGCTAAAATGGCAGTGCG    |
| <i>CTNNB1</i>    | <i>hsa_circ_0004030</i> | CCACCCTGGTGCTGACTATC   | ACTCCATCAAATCAGCTTGAGTA | 209              | ACTCCATCAAATCAGCTTGAGTA |
| <i>ETV5</i>      | <i>hsa_circ_0068440</i> | GGACACAGATCTGGCTCACG   | ATGGTGCTTTCAGCGTCTCT    | 204              | GGACACAGATCTGGCTCACG    |
| <i>LINC00221</i> | <i>hsa_circ_0101415</i> | TATGTGGTACAGGGTTGGGC   | CAATGGGACTCGCCTTCAGT    | 248              | TATGTGGTACAGGGTTGGGC    |
| <i>LINC00221</i> | <i>hsa_circ_0101416</i> | AGCGGGGACTTCCTTTATGTG  | GAATACAAGGCCGGGTCAGG    | 239              | AGCGGGGACTTCCTTTATGTG   |
| <i>PKNOX1</i>    | <i>hsa_circ_0116109</i> | TCTGCAGTCGATACATTGCTTG | TGCATCTGTTGCCCATCTTGA   | 210              | TGCATCTGTTGCCCATCTTGA   |
| <i>PKNOX1</i>    | <i>hsa_circ_0116112</i> | CCACGCCCGTGAACATGAAC   | GCATCGGGTTCAGAGCAGTT    | 223              | GCATCGGGTTCAGAGCAGTT    |
| <i>PTPRG</i>     | <i>hsa_circ_0066406</i> | GCTGGTCTACCTGGCAGATTC  | TCGAAGCCATCGAGTTGCAG    | 244              | TCGAAGCCATCGAGTTGCAG    |
| <i>RFWD2</i>     | <i>hsa_circ_0015366</i> | CTGCAAGCCAGTTGGATGAA   | TGGATCTGTTCCAGTTGCTCTC  | 210              | CTGCAAGCCAGTTGGATGAA    |
| <i>RFWD2</i>     | <i>hsa_circ_0111262</i> | CAGATGACAGTCGAACTGCAAG | TCAAGACTAGGATGCCCCGC    | 194              | CTGCAAGCCAGTTGGATGAA    |
| <i>TOPBP1</i>    | <i>hsa_circ_0121989</i> | GTGTGACTGGCTTATGTGGC   | GATGTTCCGGCTCTGGGACA    | 205              | GTGTGACTGGCTTATGTGGC    |
