# Supplementary material for: Immunopeptidomics-based identification of naturally presented non-canonical circRNA-derived peptides
Source: PubMed Central journal article supplement (PMC10943130; doi:10.1038/s41467-024-46408-3), 2024-03-15
Supplement: 41467_2024_46408_MOESM3_ESM.pdf [file 41467_2024_46408_MOESM3_ESM.pdf]

## **Description of Additional Supplementary Files**

### **Supplementary Data Legends**

**Supplementary Data 1:** CircRNA-derived peptides, overlapping the BSJ encoding region, detected in T1185B upon MG312 and IFN $\gamma$  treatments.

**Supplementary Data 2:** GOBP, GOCC and KEGG presentation enrichment analysis of differentially presented peptides upon IFN $\gamma$  treatment. Two-sided Wilcoxon-Mann-Whitney test, 1D annotation enrichment, IFN $\gamma$  versus Control, using Student's t-test difference and a Benjamini-Hochberg FDR threshold value of 1E-4 (FDR=0.02 for HLA-alleles).

**Supplementary Data 3:** KEGG and GOBP presentation enrichment analysis of differentially presented peptides upon MG132 treatment. Two-sided Wilcoxon-Mann-Whitney test, 1D annotation enrichment, 1D annotation enrichment, MG132 versus Control, using Student's t-test difference and a Benjamini-Hochberg FDR threshold value of 1E-4 (FDR=0.02 for HLA-alleles).

**Supplementary Data 4:** HLA-I peptide binding prediction in the Lung Cohort (NetMHCpan - 4.1).

**Supplementary Data 5:** HLA-II circRNA-derived peptides, overlapping the BSJ encoding region, detected in the lung cohort (eight patients with matching healthy tissue) through DDA-DIA FragPipe Analysis with group-specific FDR calculation.

**Supplementary Data 6:** HLA-II peptide binding prediction in the Lung Cohort (NetMHCIIpan - 4.1).

**Supplementary Data 7:** List of raw files used in each MS search analysis.
