# Supplementary material for: Immunopeptidomics-based identification of naturally presented non-canonical circRNA-derived peptides
Source: PubMed Central journal article supplement (PMC10943130; doi:10.1038/s41467-024-46408-3), 2024-03-15
Supplement: 41467_2024_46408_MOESM11_ESM.pdf [file 41467_2024_46408_MOESM11_ESM.pdf]

## Reporting Summary

Nature Portfolio wishes to improve the reproducibility of the work that we publish. This form provides structure for consistency and transparency in reporting. For further information on Nature Portfolio policies, see our [Editorial Policies](#) and the [Editorial Policy Checklist](#).

### Statistics

For all statistical analyses, confirm that the following items are present in the figure legend, table legend, main text, or Methods section.

n/a Confirmed

- The exact sample size ( $n$ ) for each experimental group/condition, given as a discrete number and unit of measurement
- A statement on whether measurements were taken from distinct samples or whether the same sample was measured repeatedly
- The statistical test(s) used AND whether they are one- or two-sided  
*Only common tests should be described solely by name; describe more complex techniques in the Methods section.*
- A description of all covariates tested
- A description of any assumptions or corrections, such as tests of normality and adjustment for multiple comparisons
- A full description of the statistical parameters including central tendency (e.g. means) or other basic estimates (e.g. regression coefficient) AND variation (e.g. standard deviation) or associated estimates of uncertainty (e.g. confidence intervals)
- For null hypothesis testing, the test statistic (e.g.  $F$ ,  $t$ ,  $r$ ) with confidence intervals, effect sizes, degrees of freedom and  $P$  value noted  
*Give  $P$  values as exact values whenever suitable.*
- For Bayesian analysis, information on the choice of priors and Markov chain Monte Carlo settings
- For hierarchical and complex designs, identification of the appropriate level for tests and full reporting of outcomes
- Estimates of effect sizes (e.g. Cohen's  $d$ , Pearson's  $r$ ), indicating how they were calculated

*Our web collection on [statistics for biologists](#) contains articles on many of the points above.*

### Software and code

Policy information about [availability of computer code](#)

Data collection

Data analysis

For manuscripts utilizing custom algorithms or software that are central to the research but not yet described in published literature, software must be made available to editors and reviewers. We strongly encourage code deposition in a community repository (e.g. GitHub). See the Nature Portfolio [guidelines for submitting code & software](#) for further information.

## Data

Policy information about [availability of data](#)

All manuscripts must include a [data availability statement](#). This statement should provide the following information, where applicable:

- Accession codes, unique identifiers, or web links for publicly available datasets
- A description of any restrictions on data availability
- For clinical datasets or third party data, please ensure that the statement adheres to our [policy](#)

MS raw files, reference fasta files and NewAnce, FragPipe and Spectronaut parameters and outputs generated in this study have been deposited in the ProteomeXchange Consortium via the PRIDE partner repository<sup>91</sup> under accession code PXD043989 [<https://proteomecentral.proteomexchange.org/cgi/GetDataset?ID=PX043989>]. The lung cancer cohort MS data used in this study are available in the ProteomeXchange Consortium under accession code PXD034772 [<https://proteomecentral.proteomexchange.org/cgi/GetDataset?ID=PX034772>]. Publicly available DDA raw files derived from T1185B cells treated or not with IFN used in this study are available in the ProteomeXchange Consortium under accession code PXD013649 [<https://proteomecentral.proteomexchange.org/cgi/GetDataset?ID=PX013649>]. The circBase database can be found at (<http://www.circbase.org/>). The UniProt database can be found at <https://www.uniprot.org>. The Cancer Genome Atlas (TCGA) data can be found at <https://www.cancer.gov/tcga>. GTEx Portal can be accessed through <https://www.gtexportal.org/home/86>. HLA Ligand Atlas can be accessed through <https://hla-ligand-atlas.org/welcome>. The Human Protein Atlas can be accessed through [proteinatlas.org](https://www.proteinatlas.org). Source data are provided with this paper.

## Research involving human participants, their data, or biological material

Policy information about studies with [human participants or human data](#). See also policy information about [sex, gender \(identity/presentation\), and sexual orientation](#) and [race, ethnicity and racism](#).

Reporting on sex and gender

Male/female information was collected based on informed consent. This was a proof-of-concept exploratory study with a small set of samples. Sex and gender were not considered in the study design. No analysis or correlations based on sex and gender were performed.

Reporting on race, ethnicity, or other socially relevant groupings

Not applicable.

Population characteristics

Patient characteristics of samples undergoing HLA-I immunoprecipitation during this study:

Sample Name/Diagnosis/Gender

Mel-1/Melanoma/F/40y

T1185B/Melanoma/F/60y

Patient characteristics from the publicly available MS data from the eight lung cancer patients cohort:

Sample Name/Diagnosis/Gender

C3N-02672/LUAD/F

C3N-02671/LUAD/F

C3N-02287/LUAD/M

C3N-02288/LUSC/F

C3N-02289/LUSC/M

C3N-02290/LUAD/M

C3N-03023/LCNEC/F

C3N-03421/LUAD/F

Recruitment

Tissues from Mel-1 patient were collected and biobanked. This patient was selected based on sample availability. Material was enough to conduct immunopeptidomics. This selection should not have any impact on the results obtained.

Ethics oversight

An informed consent was given by the participants, according to the requirements of the institutional review board (Ethics Commission, Centre hospitalier universitaire vaudois, CHUV).

Note that full information on the approval of the study protocol must also be provided in the manuscript.

## Field-specific reporting

Please select the one below that is the best fit for your research. If you are not sure, read the appropriate sections before making your selection.

- Life sciences       Behavioural & social sciences       Ecological, evolutionary & environmental sciences

For a reference copy of the document with all sections, see [nature.com/documents/nr-reporting-summary-flat.pdf](https://www.nature.com/documents/nr-reporting-summary-flat.pdf)

## Life sciences study design

All studies must disclose on these points even when the disclosure is negative.

Sample size

No sample-size calculation was performed. Sample size was sufficient for this proof-of-concept study by showing that circRNA-derived

|                 |                                                                                                                                                                                                                                                                                                                                                                                      |
|-----------------|--------------------------------------------------------------------------------------------------------------------------------------------------------------------------------------------------------------------------------------------------------------------------------------------------------------------------------------------------------------------------------------|
| Sample size     | peptides were identified in tested samples/patients.                                                                                                                                                                                                                                                                                                                                 |
| Data exclusions | No data was excluded.                                                                                                                                                                                                                                                                                                                                                                |
| Replication     | Two technical replicates were successfully performed for each of the MS measurements of DDA, DIA and PRM samples. Three biological replicates of T1185B and two biological replicates of Mel-1 were successfully used in the DDA analysis. Please see Supplementary Table 4 for detailed information on replicates for MS-based analyses. Agros gel experiments were performed once. |
| Randomization   | Not applicable. This was a proof-of-concept exploratory study with a small set of samples.                                                                                                                                                                                                                                                                                           |
| Blinding        | Not applicable. This was a proof-of-concept exploratory study with a small set of samples.                                                                                                                                                                                                                                                                                           |

## Reporting for specific materials, systems and methods

We require information from authors about some types of materials, experimental systems and methods used in many studies. Here, indicate whether each material, system or method listed is relevant to your study. If you are not sure if a list item applies to your research, read the appropriate section before selecting a response.

### Materials & experimental systems

### Methods

| n/a                                 | Involved in the study                                     | n/a                                 | Involved in the study                           |
|-------------------------------------|-----------------------------------------------------------|-------------------------------------|-------------------------------------------------|
| <input type="checkbox"/>            | <input checked="" type="checkbox"/> Antibodies            | <input checked="" type="checkbox"/> | <input type="checkbox"/> ChIP-seq               |
| <input type="checkbox"/>            | <input checked="" type="checkbox"/> Eukaryotic cell lines | <input checked="" type="checkbox"/> | <input type="checkbox"/> Flow cytometry         |
| <input checked="" type="checkbox"/> | <input type="checkbox"/> Palaeontology and archaeology    | <input checked="" type="checkbox"/> | <input type="checkbox"/> MRI-based neuroimaging |
| <input checked="" type="checkbox"/> | <input type="checkbox"/> Animals and other organisms      |                                     |                                                 |
| <input checked="" type="checkbox"/> | <input type="checkbox"/> Clinical data                    |                                     |                                                 |
| <input checked="" type="checkbox"/> | <input type="checkbox"/> Dual use research of concern     |                                     |                                                 |
| <input checked="" type="checkbox"/> | <input type="checkbox"/> Plants                           |                                     |                                                 |

## Antibodies

Antibodies used

Anti HLA-I antibody : from hybridoma "HB-95"

Company name : ATCC  
 Catalog number : HB-95  
 Lot number: 7001294  
 Clone name: W6/32  
 Antigenic determinant: HLA-A, B, C  
 Isotype: IgG2a  
 Host: mouse  
 Cell type: Hybridoma: B lymphocyte  
 Clonality: monoclonal

Validation

Validation by vendor following ATCC guidelines. Certificate of Analysis can be found here: [https://www.lgcstandards-atcc.org/Products/All/HB-95.aspx?geo\\_country=ch#documentation](https://www.lgcstandards-atcc.org/Products/All/HB-95.aspx?geo_country=ch#documentation)

Additionally, anti-HLA-I antibody was validated directly in our laboratory, through the use of this antibody for immuno-affinity purification of HLA-I peptides from cell lines and tissue samples. These peptides were measured by mass spectrometry, and their characteristics fit that of HLA-I peptides.

## Eukaryotic cell lines

Policy information about [cell lines and Sex and Gender in Research](#)

Cell line source(s)

Melanoma cell line T1185B was provided by Prof. Daniel Speiser from the Department of Fundamental Oncology, University of Lausanne. Melanoma cell line Mel-1 was provided by the Center of Experimental Therapy Biobank (CHUV), Lausanne.

Authentication

Samples were authenticated by comparing the names labelled on the vials received with the providers' information. Molecular HLA typing was performed.

Mycoplasma contamination

All cell lines tested negative for mycoplasma contamination.

Commonly misidentified lines  
(See [ICLAC](#) register)

No commonly misidentified cell lines were used in the study
